# Supplementary material for: Specific Mechanisms of Chromosomal Instability Indicate Therapeutic Sensitivities in High-Grade Serous Ovarian Carcinoma
Source: Oxford University Press journal article supplement (doi:10.1158/0008-5472.can-19-0852), 2020-09-30
Supplement: 00085472can190852-sup-supplementarytables4pathwayanalysis.xlsx [file 00085472can190852-sup-supplementarytables4pathwayanalysis.xlsx]

## Sheet: Contrasts_list
PARP resistance	AOCS1, OvKate (Level A) vs Cov318, G164, OvSaho, Snu119 (Level B)	FDR = 0.018
Paclitaxel resistance	Kuramochi (Level A) vs Cov318, AOCS1, OvSaho (Level B)	FDR = 0.049
Attentuated Replication stress	AOCS1, OvKate, Kuramochi (Level A) vs Cov318 (Level B)	FDR = 0.022
nucleoside response	Cov318, OvSaho (Level A) vs AOCS1 (Level B)	FDR = 0.01448
Congression Delay	G164, Kuramochi, Snu119 (Level A) vs Cov318, AOCS1 OvKate,OvSaho (Level B)	FDR = 0.02

## Sheet: PARPiResist.upGOBP
name	nAnno	nOverlap	zscore	pvalue	adjp	namespace	distance	members
angiogenesis	213	15	5.26	6.7e-06	0.00062	Process	4	FGFR1,FZD8,PRKCA,TGFB2,JAG1,CYP1B1,EPHB1,EPHB2,PDGFA,PLCD1,SHB,ADGRG1,VAV3,ACKR3,ARHGAP24
cAMP catabolic process	15	4	6.8	8.1e-06	0.00062	Process	11	PDE3A,PDE4A,PDE7A,PDE7B
axon guidance	379	21	4.95	9e-06	0.00062	Process	14	RUNX3,FGFR1,PAX6,KRAS,CRMP1,TGFB2,COL5A2,SDC2,EPHB1,EPHB2,VAV3,NTN1,LHX2,GAS1,NCK2,CACNA1H,KIF5C,APH1B,COL9A3,SEMA6C,RGMA
positive regulation of phosphatidylinositol 3-kinase signaling	54	7	5.74	1.1e-05	0.00062	Process	9	FGFR1,F2R,TGFB2,SOX9,PDGFA,NTRK2,ANGPT1
regulation of cell migration	55	7	5.67	1.3e-05	0.00062	Process	7	MAP3K1,LMNA,JAG1,AMOT,NTN1,DOCK10,SPATA13
positive regulation of blood vessel endothelial cell migration	17	4	6.32	1.6e-05	0.00064	Process	11	PRKCA,AMOT,ANGPT1,AMOTL1
embryonic skeletal system development	30	5	5.72	2.5e-05	0.00085	Process	7	SP3,COL1A1,TAPT1,PCSK5,KIAA1217
peripheral nervous system neuron development	10	3	6.31	3.1e-05	0.00091	Process	11	RUNX3,RUNX1,NTRK2
microtubule cytoskeleton organization	65	7	5.04	4.6e-05	0.00094	Process	5	CDK5RAP2,CRMP1,MID1,CDC42BPA,TACC3,OBSL1,RNF19A
cell migration	172	12	4.66	4.6e-05	0.00094	Process	6	FGFR1,CDC42BPA,TGFB2,SDC2,MDK,EMP2,MYO18A,NCK2,FAT1,RHBDF1,TNS3,SPATA13
negative regulation of vascular permeability	11	3	5.97	4.7e-05	0.00094	Process	8	PDE3A,AMOT,ANGPT1
detection of temperature stimulus involved in sensory perception of pain	11	3	5.97	4.7e-05	0.00094	Process	8	ADORA1,EPHB1,ASIC3
positive regulation of blood coagulation	12	3	5.67	7e-05	0.0013	Process	7	F2R,HPSE,NFE2L2
G2/M transition of mitotic cell cycle	140	10	4.34	0.00012	0.0015	Process	6	PKMYT1,DYNC1I2,PPP1R12B,TUBA1A,CCP110,NES,CNTRL,PLCB1,CDK5RAP2,CENPJ
skeletal system development	137	10	4.43	0.0001	0.0015	Process	6	FGFR1,SOX11,RUNX1,COL1A1,COL5A2,NPR3,PITX1,SOX9,FGFRL1,SH3PXD2B
eye development	25	4	4.99	0.00012	0.0015	Process	8	PAX6,TGFB2,SH3PXD2B,CHRDL1
homophilic cell adhesion via plasma membrane adhesion molecules	141	10	4.32	0.00013	0.0015	Process	6	NPTN,FAT1,PCDHA5,CDH18,PCDH1,PCDHB14,PCDHB9,PCDHB16,CLSTN2,FAT3
nervous system development	274	15	4.12	0.00014	0.0015	Process	6	SMARCA2,DOK5,ADORA1,CRMP1,JAG1,EPHB2,SIM1,MDK,NINJ1,NLGN1,CHRM3,TMOD2,PCDHA5,PCDH1,SDCBP2
response to wounding	54	6	4.77	9.8e-05	0.0015	Process	4	PAX6,F2R,TGFB2,PDGFA,MDK,GRIN2A
neurogenesis	25	4	4.99	0.00012	0.0015	Process	6	CDK5RAP2,TACC3,EPHB1,GRIN2A
collagen fibril organization	40	5	4.73	0.00014	0.0015	Process	6	TGFB2,COL1A1,COL5A2,CYP1B1,ADAMTS14
collagen catabolic process	74	7	4.57	0.00012	0.0015	Process	5	COL1A1,COL5A2,CTSL,MMP15,ADAMTS14,COL9A3,COL23A1
positive regulation of synapse assembly	24	4	5.12	9.9e-05	0.0015	Process	6	EPHB1,EPHB2,OXTR,NLGN1
regulation of G-protein coupled receptor protein signaling pathway	41	5	4.65	0.00016	0.0016	Process	7	PLCB1,RGS3,PDCL,RIC8B,RGS12
hemopoiesis	59	6	4.47	0.00017	0.0016	Process	8	RUNX3,TACC3,TGFB2,RUNX1,JAG1,ANGPT1
regulation of sensory perception of pain	27	4	4.74	0.00018	0.0016	Process	8	ADORA1,F2R,GRIN2A,SPX
calcium-dependent cell-cell adhesion via plasma membrane cell adhesion molecules	28	4	4.63	0.00021	0.0019	Process	6	NLGN1,PCDHB14,PCDHB9,PCDHB16
cerebral cortex development	46	5	4.28	0.0003	0.0025	Process	4	PLCB1,TACC3,NTRK2,MDK,LHX2
inositol phosphate metabolic process	46	5	4.28	0.0003	0.0025	Process	4	PLCB1,PLCD1,INPP5B,NUDT11,NUDT10
signal transduction	986	35	3.55	0.00039	0.0028	Process	4	AKT3,PPP1R12B,PLCB1,NR2F2,MAPK6,ADORA1,MAP2K6,PRKCA,SOX9,SPARC,SHB,IGFBP5,SIM1,MDK,ITPR2,TLR6,CHRM3,PDE4A,PDE7A,PDE7B,NCK2,PDCL,CAPN5,CHRNA5,CRABP2,ASIC3,SLC22A17,GABRQ,PPP2R2B,DTNA,CTNND2,HBEGF,S100A6,SH3BP2,RASSF8
hair follicle morphogenesis	31	4	4.32	0.00035	0.0028	Process	4	RUNX3,TGFB2,RUNX1,IGFBP5
neuron fate commitment	18	3	4.43	0.00039	0.0028	Process	7	PAX6,TGFB2,NOTCH3
positive regulation of synaptic transmission, glutamatergic	18	3	4.43	0.00039	0.0028	Process	8	NTRK2,OXTR,NLGN1
positive regulation of mesenchymal cell proliferation	33	4	4.14	0.00048	0.0033	Process	8	FGFR1,SOX9,PDGFA,GAS1
positive regulation of nitric-oxide synthase activity	19	3	4.28	0.00049	0.0033	Process	9	KRAS,NPR3,NOS1AP
extracellular matrix organization	312	15	3.55	0.0006	0.0039	Process	5	PRKCA,TGFB2,COL1A1,COL5A2,SOX9,SPARC,SDC2,PDGFA,FBLN1,CTSL,MMP15,ADAMTS14,COL9A3,COL23A1,EFEMP2
regulation of neuron differentiation	20	3	4.14	0.0006	0.0039	Process	10	CDK5RAP2,ZFHX3,NLGN1
actin filament organization	54	5	3.8	0.00072	0.0043	Process	6	EMP2,NCK2,TMOD3,TMOD2,FAT1
extracellular matrix disassembly	120	8	3.65	0.00071	0.0043	Process	5	COL1A1,COL5A2,SH3PXD2B,CTSL,MMP15,GSN,COL9A3,COL23A1
response to estradiol	74	6	3.74	0.00071	0.0043	Process	6	NR2F2,COL1A1,PDGFA,OXTR,MMP15,NQO1
ossification	76	6	3.66	0.00083	0.0048	Process	4	RUNX3,SP3,COL5A2,SOX9,SPARC,CHRDL1
Notch receptor processing	22	3	3.89	0.00088	0.0049	Process	7	JAG1,NOTCH3,APH1B
negative regulation of epithelial cell proliferation	56	5	3.69	0.00088	0.0049	Process	7	RUNX3,PAX6,TGFB2,SOX9,GAS1
positive regulation of protein kinase B signaling	79	6	3.54	0.001	0.0055	Process	9	MTDH,PDGFA,IGFBP5,ANGPT1,HPSE,HBEGF
cellular response to transforming growth factor beta stimulus	39	4	3.67	0.001	0.0055	Process	5	RUNX1,COL1A1,SOX9,PDE3A
embryo implantation	40	4	3.6	0.0012	0.0061	Process	4	RXRA,PCSK5,FBLN1,EMP2
positive regulation of cell adhesion	41	4	3.54	0.0013	0.0067	Process	6	PRKCA,ADGRG1,VAV3,ANGPT1
negative regulation of adenylate cyclase activity	26	3	3.46	0.0017	0.008	Process	8	PRKCA,NPR3,GABBR2
neutrophil chemotaxis	43	4	3.41	0.0016	0.008	Process	11	PRKCA,TGFB2,VAV3,CX3CL1
regulation of cell differentiation	26	3	3.46	0.0017	0.008	Process	5	RUNX3,FGFR1,PLEKHB1
synaptic transmission	414	17	3.08	0.0019	0.0087	Process	6	PLCB1,KCNH2,PRKCA,KCNMB3,KCNMA1,GRIN2A,GNG2,PDE7B,CHRNA5,CACNG4,GABRQ,CPLX1,DTNA,PCDHB14,PCDHB9,PCDHB16,GABBR2
neuron differentiation	88	6	3.22	0.002	0.0088	Process	6	RUNX3,SOX11,FZD8,RUNX1,CHRDL1,NTRK2
positive regulation of cell cycle	27	3	3.37	0.002	0.0088	Process	6	FGFR1,TGFB2,BCL2L11
response to ethanol	89	6	3.19	0.0021	0.0092	Process	6	PAX6,SPARC,GRIN2A,NQO1,GSN,OXCT1
synapse assembly	46	4	3.23	0.0022	0.0096	Process	5	NLGN1,PCDHB14,PCDHB9,PCDHB16
ephrin receptor signaling pathway	91	6	3.12	0.0024	0.01	Process	9	SDC2,EPHB1,EPHB2,VAV3,NCK2,APH1B
heart development	148	8	2.95	0.0031	0.013	Process	4	RIPPLY3,TGFB2,SH3PXD2B,SPARC,PKD2,PCSK5,OXTR,OXCT1
wound healing	71	5	3.03	0.003	0.013	Process	5	MAP3K1,TGFB2,SDC2,PDGFA,FGFR1OP2
negative regulation of neuron differentiation	50	4	3.02	0.0032	0.013	Process	11	CDK5RAP2,PAX6,JAG1,NOTCH3
lamellipodium assembly	32	3	2.97	0.0037	0.015	Process	6	VAV3,NCK2,SPATA13
platelet activation	212	10	2.82	0.0038	0.015	Process	5	F2R,PRKCA,TGFB2,COL1A1,SPARC,PDGFA,VAV3,ITPR2,SERPING1,GNG2
response to hypoxia	155	8	2.81	0.0042	0.016	Process	4	ADORA1,TACC3,TGFB2,SDC2,PDGFA,ITPR2,KCNMA1,EGLN3
cellular response to drug	53	4	2.87	0.0042	0.016	Process	5	PAX6,KCNH2,ADSSL1,PDE4A
epithelial to mesenchymal transition	34	3	2.83	0.0046	0.017	Process	8	TGFB2,SOX9,S100A4
blood coagulation	487	18	2.69	0.0047	0.017	Process	5	KRAS,F2R,PRKCA,TGFB2,COL1A1,SPARC,KCNMB3,PDGFA,VAV3,PDE3A,ITPR2,KCNMA1,ANGPT1,SERPING1,GNG2,EHD2,KIF26A,DOCK11
negative regulation of cell proliferation	381	15	2.71	0.0046	0.017	Process	6	CTBP1,SMARCA2,ADORA1,F2R,PRKCA,TGFB2,FGFRL1,CYP1B1,ADGRG1,PKD2,NCK2,WNK2,SH3BP4,TP53I11,CLMN
positive regulation of MAP kinase activity	54	4	2.83	0.0045	0.017	Process	12	FGFR1,KRAS,PDGFA,DIRAS2
regulation of synaptic plasticity	35	3	2.77	0.0051	0.018	Process	5	ADORA1,GRIN2A,CTNND2
MAPK cascade	82	5	2.64	0.0062	0.019	Process	7	FGFR1,NDST1,KRAS,MAPK6,DOK5
chondrocyte differentiation	37	3	2.64	0.0063	0.019	Process	6	RUNX3,FGFR1,PRKCA
fibroblast growth factor receptor signaling pathway	165	8	2.61	0.0063	0.019	Process	8	FGFR1,NDST1,KRAS,PRKCA,FGFRL1,PDGFA,ITPR2,HBEGF
fertilization	36	3	2.7	0.0057	0.019	Process	4	NR2F2,TDRD9,SYCP2
positive regulation of signal transduction	58	4	2.65	0.0061	0.019	Process	6	SHB,VAV3,NCK2,SH3BP2
positive regulation of gene expression	194	9	2.62	0.006	0.019	Process	7	PAX6,SOX11,KRAS,TGFB2,NTRK2,FBLN1,NFE2L2,GSN,NOS1AP
positive regulation of nitric oxide biosynthetic process	37	3	2.64	0.0063	0.019	Process	7	PKD2,PTX3,NOS1AP
vascular endothelial growth factor receptor signaling pathway	108	6	2.63	0.0062	0.019	Process	9	KRAS,PRKCA,SHB,VAV3,ITPR2,NCK2
intrinsic apoptotic signaling pathway	58	4	2.65	0.0061	0.019	Process	7	PRKCA,BCL2L11,DYNLL2,MLLT11
activation of MAPKK activity	59	4	2.61	0.0066	0.02	Process	12	KRAS,ADORA1,F2R,MAP3K1
positive regulation of osteoblast differentiation	59	4	2.61	0.0066	0.02	Process	7	SOX11,JAG1,FAM20C,CD276
blood vessel development	38	3	2.59	0.0069	0.021	Process	4	PAX6,COL1A1,FOXS1
hair follicle development	39	3	2.53	0.0076	0.022	Process	4	TGFB2,SOX9,PDGFA
positive regulation of endothelial cell migration	40	3	2.48	0.0083	0.024	Process	10	PRKCA,SPARC,ANGPT1
positive regulation of cell division	40	3	2.48	0.0083	0.024	Process	6	TGFB2,PDGFA,MDK
glycosaminoglycan biosynthetic process	41	3	2.42	0.0091	0.026	Process	7	NDST1,SDC2,HS3ST1
adenylate cyclase-inhibiting G-protein coupled receptor signaling pathway	43	3	2.32	0.011	0.028	Process	10	ADORA1,NPR3,S1PR3
peptidyl-tyrosine phosphorylation	120	6	2.34	0.011	0.028	Process	9	FGFR1,MAP2K6,EPHB1,EPHB2,NTRK2,NPTN
neurotrophin TRK receptor signaling pathway	276	11	2.36	0.01	0.028	Process	8	FGFR1,KRAS,PRKCA,PDGFA,VAV3,NTRK2,ITPR2,BCL2L11,PCSK5,HBEGF,APH1B
phosphatidylinositol-mediated signaling	120	6	2.34	0.011	0.028	Process	8	FGFR1,NPR3,PDGFA,GSN,HBEGF,NCS1
inner ear development	42	3	2.37	0.0099	0.028	Process	4	MAF,SPARC,PDGFA
cellular response to amino acid stimulus	43	3	2.32	0.011	0.028	Process	6	COL1A1,COL5A2,SH3BP4
muscle organ development	93	5	2.32	0.011	0.029	Process	5	ZFHX3,LMNA,CACNA1H,HBEGF,SGCB
antigen processing and presentation of exogenous peptide antigen via MHC class II	93	5	2.32	0.011	0.029	Process	6	DYNC1I2,CTSL,UNC93B1,DYNLL2,KIF26A
activation of protein kinase activity	44	3	2.27	0.012	0.03	Process	12	MAP3K1,TGFB2,EMP2
positive regulation of MAPK cascade	68	4	2.28	0.012	0.03	Process	9	FGFR1,F2R,PDGFA,NTRK2
positive regulation of neuron apoptotic process	45	3	2.23	0.013	0.031	Process	8	TGFB2,BCL2L11,NQO1
positive regulation of transcription, DNA-templated	499	17	2.26	0.012	0.031	Process	8	PLCB1,CDK5RAP2,PAX6,SMARCA2,SOX11,SP3,TBL1X,NR2F2,NRIP1,F2R,RUNX1,COL1A1,SOX9,MDK,LHX2,ATXN7L3,MLLT11
anatomical structure morphogenesis	125	6	2.23	0.013	0.032	Process	3	F2R,PITX1,FOXS1,S1PR3,NFE2L1,FAT1
response to peptide hormone	46	3	2.18	0.014	0.033	Process	6	COL1A1,SPARC,OXTR
protein phosphorylation	472	16	2.16	0.015	0.036	Process	7	AKT3,PKMYT1,RUNX3,CTBP1,FGFR1,MAPK6,MAP3K1,PRKCA,CDC42BPA,RSRC1,TGFB2,ST3GAL1,FAM20C,WNK2,NUAK2,SBK1
cellular component disassembly involved in execution phase of apoptosis	48	3	2.09	0.016	0.036	Process	5	LMNA,H1F0,GSN
Notch signaling pathway	129	6	2.14	0.016	0.036	Process	7	TBL1X,JAG1,MDK,NOTCH3,DTX4,APH1B
cellular response to oxidative stress	48	3	2.09	0.016	0.036	Process	5	NFE2L1,NFE2L2,ALDH3B1
positive regulation of fibroblast proliferation	48	3	2.09	0.016	0.036	Process	7	PDGFA,FBLN1,S100A6
muscle contraction	102	5	2.09	0.017	0.038	Process	6	OXTR,CACNA1H,SNTB1,TMOD3,TMOD2
response to cAMP	49	3	2.05	0.017	0.038	Process	5	COL1A1,SPARC,PDE3A
calcium ion transmembrane transport	131	6	2.1	0.017	0.038	Process	10	PKD2,ITPR2,GRIN2A,CACNA1H,CACNG4,NCS1
synaptic vesicle exocytosis	50	3	2.01	0.018	0.039	Process	9	CPLX1,SYT17,SYT13
response to retinoic acid	50	3	2.01	0.018	0.039	Process	5	RXRA,PDGFA,MEST
positive regulation of angiogenesis	103	5	2.06	0.018	0.039	Process	8	MTDH,PRKCA,RUNX1,CYP1B1,CX3CL1
cell cycle arrest	134	6	2.04	0.019	0.04	Process	6	ZFHX3,MAP2K6,TGFB2,PKD2,GAS1,AK1
epidermal growth factor receptor signaling pathway	198	8	2.05	0.019	0.041	Process	10	FGFR1,KRAS,PRKCA,SOX9,PDGFA,ITPR2,NCK2,HBEGF
negative regulation of phosphatase activity	51	3	1.97	0.019	0.041	Process	8	PKMYT1,UBN1,SH3RF2
neuron migration	106	5	1.99	0.02	0.042	Process	7	FGFR1,PAX6,NR2F2,NTRK2,NTN1
protein processing	52	3	1.93	0.02	0.042	Process	7	PCSK5,APH1B,RHBDF1
signal transduction by protein phosphorylation	52	3	1.93	0.02	0.042	Process	4	KCNH2,MAP2K6,TGFB2
apoptotic signaling pathway	106	5	1.99	0.02	0.042	Process	6	ADORA1,PRKCA,VAV3,BCL2L11,APH1B
learning	53	3	1.89	0.022	0.044	Process	8	EPHB2,NTRK2,CTNND2
negative regulation of protein phosphorylation	54	3	1.86	0.023	0.046	Process	10	PAX6,ANGPT1,FBLN1
forebrain development	54	3	1.86	0.023	0.046	Process	4	NR2F2,NDST1,NOTCH3
toll-like receptor signaling pathway	110	5	1.9	0.024	0.047	Process	12	MAP3K1,MAP2K6,CTSL,TLR6,UNC93B1
male gonad development	82	4	1.85	0.025	0.049	Process	7	SOX9,BCL2L11,LRRC6,COL9A3
platelet degranulation	83	4	1.83	0.026	0.05	Process	9	TGFB2,SPARC,PDGFA,SERPING1
positive regulation of cell migration	146	6	1.81	0.028	0.055	Process	8	F2R,PRKCA,COL1A1,PDGFA,HBEGF,CEMIP
small GTPase mediated signal transduction	472	15	1.83	0.03	0.056	Process	7	PPP1R12B,KRAS,PMF1,VAV3,ARHGAP24,INPP5B,WIPF1,RND3,ARHGAP29,ARL4C,RASL12,DIRAS2,DOCK10,DOCK11,ARL5B
memory	58	3	1.72	0.029	0.056	Process	8	PLCB1,GRIN2A,OXTR
in utero embryonic development	215	8	1.8	0.03	0.057	Process	8	FGFR1,RXRA,RUNX1,AMOT,ANGPT1,INPP5B,BCL2L11,TAPT1
glycosaminoglycan metabolic process	117	5	1.75	0.031	0.057	Process	6	NDST1,SDC2,ST3GAL1,HS3ST1,HPSE
inner ear morphogenesis	59	3	1.68	0.031	0.057	Process	7	FGFR1,EPHB2,NTN1
positive regulation of GTPase activity	436	14	1.81	0.031	0.057	Process	8	PLCB1,RGS3,VAV3,ARHGAP24,CHML,RABGAP1,RIC8B,ARHGAP29,DOCK10,DOCK11,RGS12,IQSEC2,SPATA13,S100A10
retina development in camera-type eye	59	3	1.68	0.031	0.057	Process	5	PAX6,SOX9,LHX2
vasculogenesis	60	3	1.65	0.033	0.059	Process	6	ACKR3,NTRK2,AMOT
Fc-epsilon receptor signaling pathway	186	7	1.71	0.035	0.062	Process	9	FGFR1,KRAS,MAP3K1,PDGFA,VAV3,ITPR2,HBEGF
regulation of cell proliferation	153	6	1.69	0.035	0.063	Process	5	SOX9,JAG1,PLCD1,PKD2,EGLN3,TCF7
response to glucocorticoid	63	3	1.56	0.038	0.067	Process	8	KRAS,SPARC,MDK
protein localization to plasma membrane	63	3	1.56	0.038	0.067	Process	7	EMP2,RAB40B,EHD2
cellular protein modification process	94	4	1.55	0.041	0.069	Process	7	ST3GAL1,CHRM3,MMP15,WDYHV1
microtubule-based movement	65	3	1.5	0.042	0.069	Process	5	DYNC1I2,KIF5C,KIF26A
Golgi organization	65	3	1.5	0.042	0.069	Process	5	CTBP1,OBSL1,MYO18A
smoothened signaling pathway	65	3	1.5	0.042	0.069	Process	7	PAX6,NDST1,CC2D2A
programmed cell death	159	6	1.59	0.042	0.069	Process	5	LMNA,BCL2L11,GAS1,H1F0,DYNLL2,GSN
response to drug	299	10	1.66	0.04	0.069	Process	4	MAP2K6,TGFB2,COL1A1,PDGFA,VAV3,PDE3A,MDK,GRIN2A,OXTR,OXCT1
positive regulation of catalytic activity	65	3	1.5	0.042	0.069	Process	5	PPP1R12B,MMP15,APH1B
negative regulation of neuron apoptotic process	126	5	1.57	0.042	0.069	Process	8	NES,F2R,NTRK2,MDK,ANGPT1
cellular response to tumor necrosis factor	65	3	1.5	0.042	0.069	Process	7	COL1A1,NTRK2,NFE2L2
sensory perception of sound	129	5	1.51	0.046	0.073	Process	8	FGFR1,TBL1X,COL1A1,SLC52A3,CEMIP
single organismal cell-cell adhesion	96	4	1.51	0.044	0.073	Process	5	SOX9,NTN1,FAT1,CTNND2
toll-like receptor 4 signaling pathway	97	4	1.49	0.046	0.073	Process	13	MAP3K1,MAP2K6,TLR6,TRIL
regulation of membrane potential	67	3	1.44	0.046	0.073	Process	4	KCNH2,KCNMA1,CACNA1H
positive regulation of ERK1 and ERK2 cascade	129	5	1.51	0.046	0.073	Process	12	F2R,PRKCA,PDGFA,ACKR3,ANGPT1
actin cytoskeleton organization	131	5	1.48	0.049	0.078	Process	5	PDGFA,AMOT,NUAK2,RND3,IQSEC2
negative regulation of transcription from RNA polymerase II promoter	669	19	1.56	0.051	0.079	Process	12	ZFHX3,RUNX3,CTBP1,FGFR1,MAF,NFIA,PAX6,RXRA,SMARCA2,SOX11,SP3,TBL1X,NR2F2,NRIP1,FZD8,ZBTB20,RIPPLY3,MTDH,GLIS3
cellular response to mechanical stimulus	69	3	1.38	0.05	0.079	Process	5	MAP3K1,COL1A1,SOX9
positive regulation of neuron projection development	70	3	1.36	0.052	0.081	Process	8	FGFR1,NTRK2,NPTN
energy reserve metabolic process	101	4	1.4	0.053	0.082	Process	6	PRKCA,ITPR2,CHRM3,GNG2
toll-like receptor TLR1:TLR2 signaling pathway	71	3	1.33	0.055	0.083	Process	13	MAP3K1,MAP2K6,TLR6
toll-like receptor TLR6:TLR2 signaling pathway	71	3	1.33	0.055	0.083	Process	13	MAP3K1,MAP2K6,TLR6
positive regulation of apoptotic process	277	9	1.48	0.054	0.083	Process	8	MAP2K6,CYP1B1,VAV3,KCNMA1,BCL2L11,GRIN2A,APH1B,AIFM2,MLLT11
positive regulation of transcription from RNA polymerase II promoter	886	24	1.52	0.055	0.083	Process	12	MAF,NFIA,PAX6,RXRA,SMARCA2,SOX11,SP3,TBL1X,NRIP1,FZD8,GLIS3,RUNX1,PITX1,SOX9,JAG1,PKD2,LHX2,ZNF462,NFE2L1,NFE2L2,LEO1,NCK2,AUTS2,SPX
toll-like receptor 9 signaling pathway	72	3	1.31	0.057	0.085	Process	13	MAP3K1,MAP2K6,UNC93B1
transcription from RNA polymerase II promoter	516	15	1.47	0.058	0.086	Process	11	ZFHX3,RUNX3,MAF,NFIA,PAX6,SOX11,GLIS3,PMF1,RUNX1,PITX1,SOX9,LHX2,NFE2L1,NFE2L2,PIR
brain development	172	6	1.39	0.059	0.086	Process	4	NES,CDK5RAP2,ZFHX3,ADGRG1,BCL2L11,OXCT1
positive regulation of cell proliferation	437	13	1.45	0.059	0.086	Process	6	FGFR1,SOX11,KRAS,F2R,TGFB2,SOX9,PDGFA,NTRK2,NTN1,S1PR3,EMP2,HBEGF,TNS3
toll-like receptor 2 signaling pathway	73	3	1.28	0.059	0.086	Process	13	MAP3K1,MAP2K6,TLR6
potassium ion transmembrane transport	106	4	1.3	0.063	0.091	Process	10	KCNH2,KCNMB3,PKD2,KCNMA1
RNA processing	76	3	1.2	0.067	0.096	Process	6	RBPMS,DHX40,TDRD9
lipid catabolic process	77	3	1.18	0.07	0.099	Process	5	PLCB1,ADORA1,PLCD1
organelle organization	292	9	1.31	0.072	0.1	Process	4	DYNC1I2,TUBA1A,CCP110,CNTRL,CDK5RAP2,CENPJ,DYNLL2,KIF5C,CC2D2A
mitotic cell cycle	418	12	1.27	0.081	0.11	Process	5	PKMYT1,DYNC1I2,PPP1R12B,TUBA1A,CCP110,CNTRL,CDK5RAP2,CENPJ,PRKCA,LMNA,POLD3,PMF1
liver development	81	3	1.09	0.08	0.11	Process	7	SP3,RUNX1,PKD2
MyD88-dependent toll-like receptor signaling pathway	81	3	1.09	0.08	0.11	Process	13	MAP3K1,MAP2K6,TLR6
positive regulation of cytosolic calcium ion concentration	115	4	1.12	0.083	0.11	Process	12	F2R,S1PR3,NPTN,OXTR
central nervous system development	112	4	1.18	0.076	0.11	Process	6	NES,PAX6,RUNX1,JRKL
neuron projection development	81	3	1.09	0.08	0.11	Process	5	NLGN1,CLMN,EFHD1
kidney development	84	3	1.02	0.089	0.12	Process	4	SOX11,BCL2L11,PCSK5
transport	306	9	1.17	0.091	0.12	Process	4	DYNC1I2,ITPR2,GRIN2A,CHRNA5,CRABP2,CACNA1H,ASIC3,CACNG4,DYNLL2
activation of cysteine-type endopeptidase activity involved in apoptotic process	86	3	0.978	0.095	0.12	Process	7	F2R,EGLN3,BCL2L11
cell adhesion	427	12	1.19	0.091	0.12	Process	3	PRKCA,CYP1B1,ADGRG1,ACKR3,EMP2,NINJ1,CX3CL1,FAT1,RND3,CTNND2,PPFIBP1,PCDHA5
visual perception	191	6	1.12	0.092	0.12	Process	8	PAX6,COL1A1,CYP1B1,IRX5,PDCL,TACSTD2
negative regulation of cell growth	120	4	1.03	0.095	0.12	Process	6	SMARCA2,TGFB2,GAS1,SH3BP4
regulation of insulin secretion	86	3	0.978	0.095	0.12	Process	9	PRKCA,ITPR2,CHRM3
canonical Wnt signaling pathway	85	3	0.999	0.092	0.12	Process	8	TBL1X,FZD8,TCF7
cell-matrix adhesion	87	3	0.957	0.098	0.13	Process	5	BCL2L11,EMP2,HPSE
regulation of small GTPase mediated signal transduction	122	4	1	0.1	0.13	Process	8	VAV3,ARHGAP24,INPP5B,ARHGAP29
regulation of transcription from RNA polymerase II promoter	360	10	1.05	0.11	0.14	Process	11	RUNX3,SMARCA2,SP3,NR2F2,FOXS1,SIM1,UBN1,TCF7,CIR1,ZNF518B
protein autophosphorylation	161	5	0.993	0.11	0.14	Process	9	ULK3,FGFR1,EPHB1,NTRK2,WNK2
transmembrane receptor protein tyrosine kinase signaling pathway	92	3	0.856	0.11	0.15	Process	8	DOK5,NTRK2,NPTN
aging	129	4	0.884	0.12	0.15	Process	4	NTRK2,SERPING1,NQO1,GSN
Fc-gamma receptor signaling pathway involved in phagocytosis	93	3	0.836	0.12	0.15	Process	8	VAV3,ITPR2,WIPF1
DNA replication	132	4	0.837	0.13	0.16	Process	7	RAD9A,NFIA,FAM111A,RMI2
transforming growth factor beta receptor signaling pathway	133	4	0.821	0.13	0.16	Process	8	MAP3K1,TGFB2,PDGFA,MTMR4
cell-cell signaling	248	7	0.917	0.13	0.16	Process	4	ADORA1,TGFB2,PDGFA,ADGRG1,PCSK5,FAT1,PCDH1
regulation of apoptotic process	208	6	0.902	0.13	0.16	Process	7	MAP3K1,MAP2K6,SOX9,GAS1,CARD6,NOS1AP
inflammatory response	334	9	0.898	0.14	0.17	Process	5	NDST1,ADORA1,F2R,NTRK2,S1PR3,TLR6,NFE2L1,PTX3,TRIL
chromatin modification	99	3	0.724	0.14	0.17	Process	7	SETD7,UBN1,PHF19
cellular response to DNA damage stimulus	178	5	0.762	0.15	0.18	Process	5	RAD9A,VAV3,EGLN3,INIP,SETD7
glucose homeostasis	101	3	0.688	0.15	0.18	Process	7	PAX6,IGFBP5,SESN3
apoptotic process	607	15	0.822	0.16	0.2	Process	6	MAP2K6,LMNA,SHB,EGLN3,BCL2L11,NTN1,H1F0,NUAK2,DYNLL2,GSN,PPP2R2B,PEG10,SLTM,CARD6,RNF152
cellular lipid metabolic process	145	4	0.643	0.17	0.2	Process	4	RXRA,TBL1X,OXCT1,AGPS
cell proliferation	355	9	0.71	0.18	0.21	Process	3	TACC3,TGFB2,EMP2,UCHL1,CHRM3,GNG2,CD276,TACSTD2,RHBDF1
positive regulation of protein phosphorylation	114	3	0.473	0.2	0.23	Process	10	KRAS,SOX9,NPTN
xenobiotic metabolic process	157	4	0.481	0.21	0.24	Process	4	CYP1B1,ACSS1,NQO1,OPLAH
intracellular signal transduction	365	9	0.625	0.2	0.24	Process	6	PLCB1,CDC42BPA,PLCD1,IGFBP5,PDCL,WNK2,NUAK2,SDCBP2,RGS12
positive regulation of I-kappaB kinase/NF-kappaB signaling	155	4	0.507	0.2	0.24	Process	9	MTDH,F2R,S100A4,TLR6
leukocyte migration	115	3	0.457	0.2	0.24	Process	3	KRAS,COL1A1,ANGPT1
regulation of cell cycle	115	3	0.457	0.2	0.24	Process	5	PKMYT1,CTBP1,TACC3
chemotaxis	118	3	0.412	0.21	0.25	Process	4	ACKR3,AMOT,CX3CL1
lipid metabolic process	122	3	0.353	0.23	0.26	Process	4	NR2F2,PDE3A,ALDH3B1
proteasome-mediated ubiquitin-dependent protein catabolic process	164	4	0.392	0.24	0.27	Process	10	TBL1X,KLHL42,UCHL1,NFE2L2
protein folding	166	4	0.367	0.24	0.28	Process	7	TUBA1A,DNAJB2,PDCL,TMX4
innate immune response	770	17	0.397	0.29	0.33	Process	4	FGFR1,KRAS,MAP3K1,MAP2K6,PRKCA,PDGFA,VAV3,ITPR2,CTSL,TLR6,UNC93B1,SERPING1,WIPF1,PTX3,TRIL,HBEGF,DTX4
ion transmembrane transport	271	6	0.239	0.3	0.34	Process	7	GRIN2A,CHRNA5,CACNA1H,ASIC3,GABRQ,S100A6
cell division	318	7	0.243	0.31	0.35	Process	4	TUBA1A,CNTRL,CENPJ,KLHL42,PMF1,LRRCC1,SYCP2
chromatin organization	235	5	0.127	0.34	0.37	Process	5	SMARCA2,TBL1X,ATXN7L3,ZNF462,SETD7
protein ubiquitination	324	7	0.192	0.33	0.37	Process	10	PAX6,RNF19A,NFE2L2,RAB40B,DTX4,SH3RF2,UBAC1
negative regulation of transcription, DNA-templated	472	10	0.168	0.35	0.39	Process	8	PLCB1,ZFHX3,CTBP1,SMARCA2,SP3,NR2F2,SOX9,FOXS1,CIR1,CBX1
proteolysis	433	9	0.1	0.37	0.41	Process	6	TBL1X,CTSL,MMP15,CAPN5,PRSS23,ADAMTS10,ADAMTS14,ADAMTS15,ADAMTS17
cell differentiation	450	9	-0.0183	0.42	0.46	Process	5	SH3PXD2B,SHB,ARHGAP24,FOXS1,SIM1,MDK,ANGPT1,TDRD9,PEG10
oxidation-reduction process	578	11	-0.19	0.5	0.54	Process	4	CTBP1,CYP1B1,EGLN3,UQCRH,PIR,TMX4,NQO1,ALDH3B1,SCD5,AGPS,AIFM2
mitotic nuclear division	236	4	-0.349	0.52	0.56	Process	6	PKMYT1,KLHL42,PMF1,LRRCC1
negative regulation of apoptotic process	477	8	-0.529	0.62	0.67	Process	8	MTDH,ADORA1,SOX9,PDE3A,ANGPT1,MYO18A,NUAK2,SYCP2
carbohydrate metabolic process	337	5	-0.698	0.68	0.72	Process	4	NDST1,SDC2,ST3GAL1,HS3ST1,HPSE
metabolic process	606	10	-0.647	0.68	0.73	Process	2	DYNC1I2,PLCB1,MID1,DYNLL2,EHD2,KIF5C,KIF26A,RND3,ARL4C,MEST
protein transport	343	5	-0.739	0.69	0.74	Process	5	COL1A1,RHBDF1,SELENBP1,TRAM1L1,VPS13B
intracellular protein transport	239	3	-0.84	0.71	0.75	Process	6	UNC93B1,CHML,RAB40B
RNA splicing	245	3	-0.885	0.73	0.77	Process	9	RSRC1,CIR1,PRPF18
biological_process	650	10	-0.878	0.76	0.8	Process	1	RIPPLY3,SDC2,ADAMTS10,ZNF75A,MXRA5,AUTS2,TM7SF3,NYNRIN,TARSL2,CPNE8
cytokine-mediated signaling pathway	264	3	-1.02	0.78	0.82	Process	7	KRAS,MID1,CX3CL1
immune response	338	4	-1.1	0.81	0.85	Process	3	TLR6,TCF7,CX3CL1,CD276
DNA repair	293	3	-1.22	0.84	0.87	Process	4	RAD9A,POLD3,INIP
spermatogenesis	356	4	-1.21	0.85	0.87	Process	7	SOX9,INPP5B,BCL2L11,TDRD9
post-translational protein modification	311	3	-1.33	0.88	0.9	Process	8	ST3GAL1,GALNT1,MGAT4A
viral process	555	6	-1.59	0.93	0.95	Process	4	DYNC1I2,ACKR3,FBLN1,FAM111A,UBN1,CALCOCO2
G-protein coupled receptor signaling pathway	863	10	-1.84	0.96	0.98	Process	7	FZD8,F2R,ADGRG1,ACKR3,TAPT1,S1PR3,OXTR,CHRM3,GABBR2,RIC8B
multicellular organismal development	412	3	-1.88	0.97	0.98	Process	4	TDRD9,FAT3,PLEKHB1
cellular protein metabolic process	637	6	-1.96	0.97	0.98	Process	6	TUBA1A,LMNA,IGFBP5,ST3GAL1,GALNT1,MGAT4A
transmembrane transport	641	5	-2.27	0.99	0.99	Process	4	ASIC3,SLC22A17,GABRQ,SLCO3A1,SLC25A45
gene expression	843	5	-3.02	1	1	Process	5	RXRA,PRKCA,NOTCH3,TDRD9,PHF19

## Sheet: PARPirResist.downGOBP
name	nAnno	nOverlap	zscore	pvalue	adjp	namespace	distance	members
embryonic skeletal system morphogenesis	43	4	6.61	1.5e-05	0.00091	Process	9	GLI3,HOXA3,HOXB2,HOXA5
translational initiation	134	6	5.12	5.6e-05	0.0014	Process	4	RPS12,RPS16,RPL13A,EIF3D,EIF3G,EIF6
translational elongation	95	5	5.2	6.8e-05	0.0014	Process	7	RPS12,RPS16,RPL13A,EEF1A1,HBS1L
translation	222	7	4.27	0.00022	0.0031	Process	6	RPS12,RPS16,RPL13A,EIF3D,EIF3G,EEF1A1,HBS1L
negative regulation of cell growth	120	5	4.44	0.00025	0.0031	Process	6	CDKN1B,CDKN2A,SMAD4,SMARCA4,NDRG3
regulation of protein stability	46	3	4.62	0.00035	0.0036	Process	4	CDKN2A,XBP1,USP19
anterior/posterior pattern specification	87	4	4.25	0.00044	0.0039	Process	7	GLI3,HOXA3,HOXB2,HOXA5
cell morphogenesis	54	3	4.17	0.00064	0.0044	Process	6	SMARCA4,STK4,PDPN
rRNA processing	92	4	4.09	0.00056	0.0044	Process	6	CDKN2A,RPS16,FBL,EMG1
response to estrogen	59	3	3.94	0.0009	0.0056	Process	7	GLI3,TNFRSF11B,GSTM3
gene expression	843	14	3.26	0.0012	0.0068	Process	5	SMAD4,SUPT5H,UPF1,RPS12,RPS16,RPL13A,LSM5,EIF3D,EIF3G,TAF6,SNAPC3,EEF1A1,GARS,IGF2BP1
nuclear-transcribed mRNA catabolic process, nonsense-mediated decay	117	4	3.43	0.0017	0.0079	Process	11	UPF1,RPS12,RPS16,RPL13A
somatic stem cell maintenance	68	3	3.57	0.0015	0.0079	Process	9	GATA2,SMAD4,LIG4
protein polyubiquitination	126	4	3.23	0.0023	0.0094	Process	11	CDKN2A,TPP2,SASH1,NHLRC1
cellular protein metabolic process	637	11	3.02	0.0024	0.0094	Process	6	CDKN2A,XBP1,RPS12,RPS16,RPL13A,EIF3D,EIF3G,EEF1A1,SLC17A5,MUC1,EXOC6
palate development	77	3	3.27	0.0024	0.0094	Process	4	GLI3,SMAD4,PAK1IP1
transforming growth factor beta receptor signaling pathway	133	4	3.1	0.0029	0.011	Process	8	SMAD4,STRAP,MAP3K7,LTBP2
translational termination	87	3	2.99	0.0038	0.013	Process	8	RPS12,RPS16,RPL13A
cellular response to lipopolysaccharide	88	3	2.96	0.0039	0.013	Process	6	XBP1,PAF1,NFKBIB
response to hypoxia	155	4	2.72	0.0056	0.017	Process	4	CDKN1B,SMAD4,BDNF,ALDOC
osteoblast differentiation	101	3	2.65	0.0064	0.019	Process	5	ALPL,FBL,SND1
negative regulation of cell proliferation	381	7	2.57	0.0068	0.019	Process	6	CDKN1B,CDKN2A,GLI3,SMAD4,STK4,TAF6,NEURL1
SRP-dependent cotranslational protein targeting to membrane	107	3	2.53	0.0078	0.02	Process	10	RPS12,RPS16,RPL13A
negative regulation of transcription, DNA-templated	472	8	2.5	0.0077	0.02	Process	8	PHB2,CDKN1B,CDKN2A,GLI3,SMAD4,SMARCA4,ZHX3,EID2
viral transcription	109	3	2.49	0.0083	0.021	Process	8	RPS12,RPS16,RPL13A
negative regulation of transcription from RNA polymerase II promoter	669	10	2.37	0.0098	0.023	Process	12	GATA2,GLI3,SMAD4,SMARCA4,SUPT5H,XBP1,STRAP,ZHX3,PAF1,MEPCE
glucose metabolic process	125	3	2.2	0.013	0.031	Process	8	NHLRC1,ALDOC,GYG1
positive regulation of apoptotic process	277	5	2.12	0.016	0.036	Process	8	CDKN2A,DNM2,STK4,HOXA5,NEURL1
skeletal system development	137	3	2.01	0.018	0.039	Process	6	ALPL,TNFRSF11B,DLL3
G2/M transition of mitotic cell cycle	140	3	1.97	0.019	0.04	Process	6	DNM2,TPD52L1,CEP250
viral life cycle	144	3	1.92	0.021	0.042	Process	6	RPS12,RPS16,RPL13A
receptor-mediated endocytosis	151	3	1.82	0.025	0.048	Process	7	DNM2,PRSS12,M6PR
transcription from RNA polymerase II promoter	516	7	1.7	0.035	0.066	Process	11	GATA2,GLI3,SUPT5H,XBP1,HOXA5,TAF6,SNAPC3
viral process	555	7	1.5	0.05	0.092	Process	4	SUPT5H,RPS12,RPS16,RPL13A,SND1,LIG4,TAF6
angiogenesis	213	3	1.17	0.071	0.12	Process	4	XBP1,MAP3K7,HOXA3
in utero embryonic development	215	3	1.15	0.073	0.12	Process	8	GLI3,SMAD4,LIG4
positive regulation of transcription, DNA-templated	499	6	1.26	0.073	0.12	Process	8	CDKN2A,DNM2,GLI3,SMAD4,SMARCA4,NPAS3
extracellular matrix organization	312	4	1.16	0.079	0.13	Process	5	SMARCA4,TNFRSF11B,KAZALD1,MFAP5
carbohydrate metabolic process	337	4	0.995	0.1	0.16	Process	4	NHLRC1,ALDOC,GYG1,GNPDA1
signal transduction	986	10	1.08	0.11	0.16	Process	4	DNM2,STK4,PDPN,TNFRSF11B,NPAS3,NFKBIB,HBS1L,M6PR,SERGEF,NDRG3
protein transport	343	4	0.958	0.11	0.16	Process	5	KIF18A,XBP1,BET1,EXOC6
cell proliferation	355	4	0.887	0.12	0.17	Process	3	SMAD4,PDPN,LIG4,PAK1IP1
positive regulation of transcription from RNA polymerase II promoter	886	9	1.03	0.11	0.17	Process	12	CDKN2A,GATA2,GLI3,SMAD4,SMARCA4,SUPT5H,XBP1,PAF1,HOXA5
nervous system development	274	3	0.715	0.14	0.2	Process	6	PDPN,BDNF,NEURL1
apoptotic process	607	6	0.761	0.16	0.21	Process	6	XBP1,STK4,MAP3K7,TNFRSF11B,ALDOC,C6orf120
DNA repair	293	3	0.595	0.17	0.22	Process	4	UPF1,LIG4,EYA4
organelle organization	292	3	0.602	0.17	0.22	Process	4	CEP250,XBP1,EXOC6
mitotic cell cycle	418	4	0.551	0.19	0.23	Process	5	KIF18A,CDKN1B,CDKN2A,CEP250
multicellular organismal development	412	4	0.581	0.18	0.23	Process	4	KAZALD1,HOXB2,EYA4,HOXA9
response to drug	299	3	0.56	0.18	0.23	Process	4	CDKN1B,XBP1,TNFRSF11B
post-translational protein modification	311	3	0.49	0.19	0.23	Process	8	CDKN2A,SLC17A5,MUC1
cell division	318	3	0.451	0.2	0.24	Process	4	LIG4,HAUS6,USP44
cell differentiation	450	4	0.401	0.23	0.27	Process	5	ZHX3,KAZALD1,NDRG3,EID2
regulation of transcription from RNA polymerase II promoter	360	3	0.232	0.27	0.3	Process	11	SMARCA4,NPAS3,ZNF76
negative regulation of apoptotic process	477	4	0.282	0.27	0.3	Process	8	PHB2,CDKN1B,GLI3,XBP1
axon guidance	379	3	0.141	0.3	0.33	Process	14	GLI3,SMAD4,BDNF
positive regulation of cell proliferation	437	3	-0.109	0.4	0.42	Process	6	CDKN1B,HOXA3,ROMO1
positive regulation of GTPase activity	436	3	-0.105	0.39	0.42	Process	8	SIPA1L3,SERGEF,ARHGEF25
blood coagulation	487	3	-0.301	0.48	0.5	Process	5	KIF18A,GATA2,TFPI2
oxidation-reduction process	578	3	-0.608	0.61	0.63	Process	4	GLUD1,ALKBH4,STEAP1B
innate immune response	770	4	-0.705	0.67	0.68	Process	4	CDKN1B,HERC5,MAP3K7,NFKBIB
transmembrane transport	641	3	-0.797	0.69	0.69	Process	4	SLC17A5,SLC39A14,SLC2A12

## Sheet: siggenes_PARPiRes_0620
gene.names	direction Level A vs Level B
GLIS3	up
NOTCH3	up
NPTN	up
HCFC1R1	up
MAP3K1	up
F2R	up
MXRA5	up
ARL5B	up
CHRM3	up
CFHR3	up
PCDHB9	up
TRAM1L1	up
CFAP300	up
LRIG3	up
CENPJ	up
KIF5C	up
PPFIBP2	up
ADORA1	up
UBL3	up
RAD9A	up
KIF26A	up
PCGF3	up
PDXDC1	up
CHRNA5	up
TAPT1	up
PEG10	up
MTUS1	up
ZNF75A	up
MAF	up
CYP1B1	up
JAG1	up
FKBP7	up
CHML	up
NPR3	up
PDE7B	up
RASL12	up
RNF212	up
FGFRL1	up
PKD2	up
AIF1L	up
NDST1	up
CDH18	up
NRIP1	up
PLCB1	up
DTNA	up
CDC42BPA	up
PDCL	up
SEPSECS	up
SHB	up
SLC25A45	up
MYO18A	up
SLTM	up
ADAMTS15	up
SIM1	up
MID1	up
TGFB2	up
S100A10	up
ZNF462	up
SYNPO	up
VPS13C	up
ARHGAP24	up
FAM111A	up
ACSS1	up
TMEM130	up
WIPF1	up
RNF152	up
PDE4A	up
TMEM246	up
CALCOCO2	up
GSN	up
OXTR	up
SH3BP2	up
IGFBP5	up
S100A6	up
CEP112	up
PAX6	up
B3GALNT1	up
CAPN5	up
NPDC1	up
DHX40	up
SDCBP2	up
ARL4C	up
CHRDL1	up
DYNLL2	up
GABBR2	up
CARD19	up
FJX1	up
ADAMTS14	up
TDRD9	up
CPLX1	up
TMOD2	up
CTSL	up
EPHB1	up
OXCT1	up
DNAJB2	up
AK1	up
PALMD	up
RBPMS	up
ALDH3B1	up
PHYHIPL	up
TLR6	up
FBXL16	up
PAQR4	up
DIRAS2	up
GADL1	up
INIP	up
AOPEP	up
GAS1	up
UNC93B1	up
CCDC30	up
SLC52A3	up
RGS3	up
AMOTL1	up
RHBDF1	up
TCF7	up
FAM193A	up
SH3RF2	up
WDR31	up
AKT3	up
VPS13B	up
PKMYT1	up
TACC3	up
CRAMP1	up
TRIL	up
ATXN7L3	up
SLC35E2B	up
ASIC3	up
NTN1	up
NQO1	up
TMEM184C	up
EGLN3	up
TANC1	up
SMARCA2	up
DYNC1I2	up
MLLT11	up
RND3	up
ULK3	up
ARHGAP29	up
SPATS2L	up
LNPK	up
MAP3K20	up
ZNF518B	up
HIRIP3	up
CCDC191	up
NSD2	up
CBX1	up
RNF19A	up
MMP15	up
DOCK10	up
ULBP2	up
JRKL	up
NFE2L1	up
COL1A1	up
PRSS23	up
CTBP1	up
CC2D2A	up
SGCB	up
HPSE	up
NFE2L2	up
AGPS	up
GALNT1	up
CDK5RAP2	up
MTMR4	up
CNTRL	up
MAP2K6	up
ABHD10	up
SH3PXD2B	up
BOD1L1	up
INPP5B	up
SH3BP4	up
CARD6	up
UBN1	up
NLGN1	up
RABGAP1	up
SPX	up
ZNF551	up
CEP126	up
TMOD3	up
CAST	up
MDK	up
PRKCA	up
TOR4A	up
EHD2	up
PHF19	up
EFEMP2	up
SETD7	up
RMI2	up
TARSL2	up
CCDC82	up
LMNA	up
SEZ6L2	up
FAM114A1	up
SDC2	up
MTSS2	up
SPPL2A	up
TMX4	up
LEO1	up
MSI2	up
NECTIN3	up
AP002956.1	up
AFAP1	up
UCHL1	up
UQCRHL	up
PTX3	up
TUBA1A	up
UQCRH	up
DOCK11	up
TNS3	up
COL9A3	up
LAYN	up
SOX9	up
SYCP2	up
TMEM178A	up
OPLAH	up
WDR90	up
MGAT4A	up
OBSL1	up
METRN	up
NR2F2	up
PCDHA5	up
JMJD8	up
RIC8B	up
HBEGF	up
MAPK6	up
CRMP1	up
NTRK2	up
COL5A2	up
FAT3	up
FOXS1	up
AIFM2	up
FGFR1	up
EFHD1	up
APH1B	up
ITPR2	up
PDE3A	up
KCNMA1	up
RASSF8	up
SOX11	up
SPARC	up
FAM173A	up
PMF1	up
ADAMTS17	up
CTNND2	up
CASC1	up
GABRQ	up
SYNM	up
CACNA1H	up
ANGPT1	up
GNG2	up
CD276	up
FAM222A	up
AASDH	up
ADAMTS10	up
LHX2	up
TM7SF3	up
PCDH1	up
FGFR1OP2	up
KRAS	up
SEMA6C	up
CPNE8	up
NUDT10	up
KLHL42	up
ACCS	up
RAB40B	up
CLMN	up
SESN3	up
ENDOD1	up
TP53I11	up
KLHL29	up
SLCO3A1	up
KCNH2	up
NFIA	up
SPTLC3	up
TENT5B	up
COL23A1	up
GUCY1B1	up
CLSTN2	up
GRIN2A	up
PIR	up
POLD3	up
S100A4	up
GALNT17	up
VAV3	up
IQSEC2	up
RSRC1	up
ST3GAL1	up
SNTB1	up
BCL2L11	up
LCMT2	up
CCP110	up
KCNMB3	up
AMOT	up
PPP1R12B	up
CASC4	up
ATP5MC3	up
UBAC1	up
DOK5	up
WDR41	up
RNF150	up
MNS1	up
SPATA13	up
MEST	up
NCS1	up
NOS1AP	up
H1F0	up
S100A2	up
LRRCC1	up
RIPPLY3	up
NCK2	up
CRABP2	up
SBK1	up
RGS12	up
SP3	up
GREB1	up
KIAA1217	up
METTL7A	up
CX3CL1	up
FHDC1	up
WNK2	up
ADGRG1	up
AUTS2	up
ADSSL1	up
KIAA0232	up
CACNG4	up
PCSK5	up
S1PR3	up
TBL1X	up
DTX4	up
CEMIP	up
PLEKHB1	up
PDE7A	up
IRX5	up
RGMA	up
S100A3	up
TSPOAP1	up
DZANK1	up
CIR1	up
NUAK2	up
PRPF18	up
FZD8	up
PITX1	up
RUNX1	up
PPFIBP1	up
SHISA9	up
PLCD1	up
LRRC6	up
PCDHB14	up
FAM43A	up
ZFHX3	up
PDGFA	up
ZC2HC1A	up
EPHB2	up
ZBTB20	up
NINJ1	up
OSBPL6	up
TSKU	up
FAM20C	up
FBLN1	up
RXRA	up
FAT1	up
NES	up
CAMK2N1	up
WDYHV1	up
NYNRIN	up
ACKR3	up
LIX1	up
SELENBP1	up
NUDT11	up
SERPING1	up
IQCG	up
SLC22A17	up
SYT17	up
SCD5	up
SESTD1	up
EMP2	up
TACSTD2	up
MTDH	up
TNNT1	up
PCDHB16	up
RUNX3	up
HS3ST1	up
PPP2R2B	up
SYT13	up
ALDOC	down
HOXB2	down
RSPO4	down
DLL3	down
RACK1	down
ALPL	down
KAZALD1	down
GYG1	down
REPIN1	down
ARHGEF25	down
SASH1	down
SERGEF	down
LPAR3	down
MEIOB	down
CEP250	down
GLI3	down
CALB1	down
GLYCTK	down
SAMHD1	down
DNM2	down
STK4	down
SLC27A5	down
ZNF556	down
USP19	down
NDRG3	down
SMARCA4	down
NEURL1	down
COX7A2	down
ROMO1	down
RPS16	down
PLTP	down
RPL13A	down
EEF1A1	down
EIF3G	down
EIF6	down
NHLRC1	down
TPP2	down
KRI1	down
NUDT3	down
NFKBIB	down
SLAIN1	down
UPF1	down
EIF3D	down
PHB2	down
EMG1	down
SLC17A5	down
GNPDA1	down
STRAP	down
GARS	down
PARP11	down
TFPI2	down
MFAP5	down
RIMS1	down
HERPUD2	down
TNFRSF11B	down
BDNF	down
ZHX3	down
TAF6	down
PODXL	down
HOXA5	down
PDPN	down
CLGN	down
GLCCI1	down
IGF2BP1	down
BET1	down
ASRGL1	down
MAGOHB	down
LSM5	down
C6orf120	down
TMEM30A	down
SLC2A12	down
STEAP1B	down
ZBED6CL	down
LPCAT3	down
HOXA9	down
SNAPC3	down
FUOM	down
LTBP2	down
FZD3	down
ZNF793	down
ZDHHC14	down
GSTM3	down
RPS12	down
KIF18A	down
XBP1	down
EYA4	down
HERC5	down
PAK1IP1	down
USP44	down
CDKN1B	down
CDKN2A	down
ZNF790	down
HOXA3	down
MMP24OS	down
ADGRL2	down
GLUD1	down
HNRNPUL2	down
M6PR	down
GATA2	down
LRCH2	down
FBL	down
NHSL1	down
SLC39A14	down
PPP1R35	down
ZNF829	down
ACTR3B	down
EID2	down
NPAS3	down
MEPCE	down
THAP8	down
ALKBH4	down
PAF1	down
SUPT5H	down
HBS1L	down
MOB3B	down
HAUS6	down
MTAP	down
MUC1	down
EXOC6	down
PEX7	down
LIG4	down
TMEM170B	down
KIAA1671	down
SAAL1	down
ZNF76	down
PRSS12	down
SND1	down
TPD52L1	down
SIPA1L3	down
PHF20	down
MAP3K7	down
SMAD4	down

## Sheet: PaclitaxRes.upGOBP
name	nAnno	nOverlap	zscore	pvalue	adjp	namespace	distance	members
negative regulation of angiogenesis	56	7	6.54	2.7e-06	0.00026	Process	8	CCL2,PDE3B,TIE1,SEMA3E,SULF1,RGCC,SPINK5
negative regulation of transcription regulatory region DNA binding	14	4	8.08	1.7e-06	0.00026	Process	7	MSX2,PER2,HEY2,LHX2
angiogenesis	213	13	5.3	8e-06	0.0004	Process	4	HOXB3,SOX18,CCL2,SHC1,GJA5,MFGE8,PDE3B,THY1,TIE1,NRP2,PRKD2,EGFL7,THSD7A
aging	129	10	5.62	6.7e-06	0.0004	Process	4	FOXG1,AURKB,CCL2,APOE,COL3A1,IGFBP2,ALDOC,PDE4D,ENO3,GSN
bleb assembly	10	3	7.19	1.2e-05	0.00048	Process	6	LPAR3,MYLK,EMP1
positive regulation of transcription from RNA polymerase II promoter	886	30	4.4	3e-05	0.00085	Process	12	SIX3,TP53,HOXD8,HOXD9,NFIA,NFIB,STAT6,NKX2-1,ZFPM2,HEY2,NIPBL,STRN3,LEF1,BCL11A,SOX18,E2F5,CKAP2,PRKDC,PRKD2,SOX5,MED21,LHX2,PHIP,RGCC,SLC9A1,ARNTL2,ETV1,AGO2,AUTS2,IL33
regulation of membrane repolarization	12	3	6.49	2.8e-05	0.00085	Process	5	KCNH2,AKAP6,KCNE3
axon guidance	379	17	4.56	3.7e-05	0.00087	Process	14	NKX2-1,KRAS,COL2A1,COL3A1,NRP2,SEMA3E,CD24,EFNB1,VASP,LHX2,ETV1,DLG4,SDCBP,UNC5C,BOC,TIAM1,COL9A3
actin filament polymerization	25	4	5.77	4e-05	0.00087	Process	9	MTSS1,GSN,DIAPH1,ARHGAP6
phospholipid efflux	14	3	5.94	5.5e-05	0.0011	Process	10	APOE,ABCA4,APOC1
negative regulation of transcription from RNA polymerase II promoter	669	24	4.22	6.6e-05	0.0012	Process	12	TP53,DACH1,FOXG1,HOXB3,HOXD8,HOXD9,IFI27,MSX2,NFIA,NFIB,STAT6,NKX2-1,TRPS1,PER2,AURKB,CIC,ZFPM2,HEY2,ZMYND8,NIPBL,STRN3,LEF1,BCL11A,SOX18
negative regulation of cell migration	88	7	4.79	7.8e-05	0.0013	Process	8	DACH1,NKX2-1,THY1,TIE1,EGFL7,SULF1,SLC9A3R1
embryonic heart tube development	16	3	5.49	9.7e-05	0.0015	Process	6	SOX18,GJA5,NDRG4
regulation of release of sequestered calcium ion into cytosol by sarcoplasmic reticulum	17	3	5.3	0.00013	0.0017	Process	11	AKAP6,CALM3,PDE4D
cellular response to insulin stimulus	71	6	4.63	0.00013	0.0017	Process	9	CCL2,PRKDC,PDE3B,AKT2,SLC9A1,VAMP2
embryonic forelimb morphogenesis	33	4	4.84	0.00016	0.0019	Process	9	HOXD9,MSX2,NIPBL,CRABP2
regulation of neurogenesis	18	3	5.12	0.00016	0.0019	Process	7	HOXB3,PER2,CHD7
positive regulation of nitric-oxide synthase activity	19	3	4.95	0.0002	0.0022	Process	9	KRAS,APOE,CALM3
vasculogenesis	60	5	4.19	0.00037	0.003	Process	6	ZFPM2,HEY2,SOX18,TIE1,EGFL7
outflow tract morphogenesis	39	4	4.33	0.00036	0.003	Process	4	HEY2,NIPBL,SOX18,GJA5
inner ear morphogenesis	59	5	4.24	0.00034	0.003	Process	7	FOXG1,SPRY2,COL2A1,CHD7,FZD3
vascular endothelial growth factor receptor signaling pathway	108	7	4.08	0.00033	0.003	Process	9	KRAS,CCL2,NRP2,PRKD2,SULF1,RICTOR,CALM3
artery morphogenesis	22	3	4.52	0.00036	0.003	Process	11	APOE,GJA5,CHD7
ventricular septum morphogenesis	21	3	4.66	0.0003	0.003	Process	12	ZFPM2,HEY2,GJA5
somitogenesis	40	4	4.26	0.00041	0.0032	Process	6	TP53,LEF1,PRKDC,FOXB1
negative regulation of Wnt signaling pathway	41	4	4.19	0.00046	0.0035	Process	8	SIX3,TRABD2B,GRB10,NXN
oligodendrocyte differentiation	24	3	4.28	0.00051	0.0038	Process	8	NKX2-1,APOE,SOX5
negative regulation of transcription, DNA-templated	472	17	3.55	0.00056	0.004	Process	8	SIX3,TP53,DACH1,FOXG1,MSX2,NKX2-1,PER2,ZFPM2,HEY2,NIPBL,STRN3,LEF1,SOX18,SOX5,LIMS1,WWP1,ZNF423
positive regulation of endothelial cell proliferation	66	5	3.9	0.00062	0.0042	Process	8	CCL2,NRP2,PRKD2,EGFL7,RICTOR
cholesterol efflux	27	3	3.96	0.00082	0.0052	Process	9	APOE,ABCA4,APOC1
regulation of sensory perception of pain	27	3	3.96	0.00082	0.0052	Process	8	GRIN2D,SLC9A1,MGLL
negative regulation of endothelial cell proliferation	28	3	3.86	0.00094	0.0058	Process	8	APOE,SULF1,RGCC
response to gamma radiation	29	3	3.77	0.0011	0.0063	Process	6	TP53,CCL2,PRKDC
positive regulation of BMP signaling pathway	29	3	3.77	0.0011	0.0063	Process	9	MSX2,SULF1,ZNF423
actin cytoskeleton organization	131	7	3.45	0.0012	0.0064	Process	5	MTSS1,ADD2,SLC9A3R1,SDCBP,CYTH2,NPHP4,ARHGAP26
T cell differentiation	30	3	3.69	0.0012	0.0064	Process	11	BCL11A,JAG2,CHD7
response to retinoic acid	50	4	3.63	0.0012	0.0064	Process	5	APOE,TIE1,IGFBP2,IGFBP7
establishment of protein localization	30	3	3.69	0.0012	0.0064	Process	4	LIMS1,DLG4,MCC
cell junction assembly	77	5	3.45	0.0014	0.0071	Process	5	LIMS1,VASP,CDH6,LAMC2,FLNC
skeletal system development	137	7	3.31	0.0016	0.0077	Process	6	TRPS1,COL2A1,COL3A1,GJA5,JAG2,RAI1,CHD7
response to mechanical stimulus	54	4	3.42	0.0016	0.0078	Process	4	CCL2,COL3A1,IGFBP2,TNC
heart morphogenesis	33	3	3.45	0.0018	0.0081	Process	8	NIPBL,COL2A1,CHD7
regulation of cell migration	55	4	3.38	0.0018	0.0081	Process	7	JAG2,AKT2,UNC5C,SPATA13
epithelial to mesenchymal transition	34	3	3.38	0.002	0.0085	Process	8	LEF1,LIMS1,S100A4
dorsal/ventral pattern formation	34	3	3.38	0.002	0.0085	Process	7	FOXG1,LHX2,ARL13B
response to cytokine	56	4	3.33	0.0019	0.0085	Process	5	COL3A1,IL6R,LIFR,OSMR
epidermis development	83	5	3.24	0.0021	0.0086	Process	6	KLK5,CRABP2,LAMC2,EMP1,SCEL
chondrocyte differentiation	37	3	3.17	0.0027	0.011	Process	6	NFIB,TRPS1,COL2A1
cartilage development	61	4	3.11	0.0028	0.011	Process	6	HOXB3,COL2A1,SOX5,SULF1
extracellular matrix disassembly	120	6	3	0.0031	0.012	Process	5	COL2A1,COL3A1,A2M,GSN,LAMC2,COL9A3
response to hypoxia	155	7	2.93	0.0034	0.013	Process	4	CCL2,ACTN4,ALDOC,DPP4,XRCC1,PDLIM1,CD24
hair follicle development	39	3	3.05	0.0033	0.013	Process	4	SOX18,FZD3,CD109
cell adhesion	427	14	2.83	0.0035	0.013	Process	3	CCL2,MFGE8,NRP2,PRKD2,EGFL7,IGFBP7,TNC,MTSS1,EFNB1,SSPN,CDH6,LAMC2,PDZD2,BOC
positive regulation of gene expression	194	8	2.84	0.0039	0.013	Process	7	NKX2-1,LEF1,SPRY2,KRAS,TNC,LIMS1,RGCC,GSN
positive regulation of cell-substrate adhesion	40	3	2.99	0.0036	0.013	Process	7	LIMS1,EGFLAM,CCDC80
Wnt signaling pathway	157	7	2.89	0.0036	0.013	Process	7	LEF1,CD24,SLC9A3R1,TRABD2B,MCC,LGR6,NXN
cytokine-mediated signaling pathway	264	10	2.88	0.0034	0.013	Process	7	IFI27,KRAS,CCL2,IFI6,IL6R,MX1,IL11RA,LIFR,IFIT1,IL17RD
cardiac muscle contraction	43	3	2.83	0.0047	0.016	Process	8	KCNH2,MAP2K3,TNNC1
type I interferon signaling pathway	69	4	2.8	0.0048	0.016	Process	8	IFI27,IFI6,MX1,IFIT1
gluconeogenesis	45	3	2.73	0.0056	0.018	Process	9	PER2,ALDOC,ENO3
cellular protein localization	46	3	2.68	0.006	0.019	Process	5	TP53,NIPBL,SLC9A3R1
brain development	172	7	2.62	0.0063	0.02	Process	4	SIX3,FOXG1,NKX2-1,NIPBL,PRKDC,NDRG4,UNC5C
Ras protein signal transduction	75	4	2.6	0.0068	0.021	Process	8	TP53,KRAS,SHC1,SDCBP
platelet activation	212	8	2.56	0.0069	0.021	Process	5	TUBA4A,SHC1,COL3A1,ACTN4,CALM3,A2M,MGLL,DGKA
in utero embryonic development	215	8	2.52	0.0075	0.022	Process	8	TP53,ZFPM2,SOX18,JAG2,CHD7,TIE1,SOX5,MTSS1
adult locomotory behavior	49	3	2.54	0.0075	0.022	Process	4	HOXD9,GRIN2D,PREX2
cell fate commitment	49	3	2.54	0.0075	0.022	Process	5	HEY2,SPRY2,SOX5
cytoskeleton organization	109	5	2.51	0.0079	0.023	Process	5	CCL2,APOE,THY1,PHIP,DIAPH1
heart looping	54	3	2.33	0.011	0.028	Process	10	SOX18,NDRG4,ARL13B
platelet degranulation	83	4	2.36	0.01	0.028	Process	9	TUBA4A,ACTN4,CALM3,A2M
protein complex assembly	115	5	2.37	0.01	0.028	Process	5	TP53,VAMP2,ADD2,DLG4,SLC9A3R1
positive regulation of cell proliferation	437	13	2.35	0.01	0.028	Process	6	SERTAD1,LEF1,KRAS,SHC1,TNC,DPP4,PHIP,IL6R,TSC22D1,EIF5A,LIFR,PTN,OSMR
insulin receptor signaling pathway	151	6	2.35	0.01	0.028	Process	9	KRAS,SHC1,PDE3B,PHIP,AKT2,GRB10
cellular response to drug	53	3	2.37	0.0099	0.028	Process	5	TP53,KCNH2,CCL2
blood coagulation	487	14	2.31	0.011	0.029	Process	5	TP53,TUBA4A,ZFPM2,KRAS,SHC1,PDE3B,ACTN4,CALM3,A2M,MGLL,SERPINA5,PROCR,CD59,DGKA
extracellular matrix organization	312	10	2.31	0.011	0.029	Process	5	COL2A1,COL3A1,TNC,A2M,LAMC2,COL9A3,EGFLAM,CCDC80,SPINK5,LOXL1
response to calcium ion	55	3	2.3	0.011	0.029	Process	6	CALM3,TNNT2,S100A16
cell growth	56	3	2.26	0.012	0.03	Process	3	NDRG4,SLC9A1,EMP1
extrinsic apoptotic signaling pathway	56	3	2.26	0.012	0.03	Process	7	IL6R,KRT8,IL33
odontogenesis of dentin-containing tooth	59	3	2.15	0.014	0.034	Process	9	LEF1,JAG2,TNC
response to ethanol	89	4	2.2	0.014	0.034	Process	6	CCL2,APOE,TNC,GSN
retina development in camera-type eye	59	3	2.15	0.014	0.034	Process	5	CHD7,LHX2,NPHP4
negative regulation of neuron apoptotic process	126	5	2.14	0.015	0.036	Process	8	CCL2,UBE2V2,APOE,FOXB1,OXR1
Notch signaling pathway	129	5	2.09	0.017	0.039	Process	7	TP53,HEY2,JAG2,AGO2,ZNF423
sensory perception of sound	129	5	2.09	0.017	0.039	Process	8	NIPBL,SPRY2,COL2A1,CHD7,DIAPH1
fibroblast growth factor receptor signaling pathway	165	6	2.11	0.016	0.039	Process	8	SPRY2,KRAS,SHC1,RICTOR,CALM3,AGO2
transcription from RNA polymerase II promoter	516	14	2.08	0.018	0.041	Process	11	SIX3,HOXD8,MSX2,NFIA,NFIB,NKX2-1,TRPS1,HEY2,LEF1,SOX5,LHX2,MED4,ETV1,TSC22D1
single organismal cell-cell adhesion	96	4	2.03	0.018	0.041	Process	5	SHC1,THY1,CD24,NPHP4
small GTPase mediated signal transduction	472	13	2.06	0.019	0.042	Process	7	AURKB,NDEL1,KRAS,ARL13B,CALM3,MYLK,A2M,DLG4,ARHGAP26,DIAPH1,TIAM1,ARHGAP6,ARL4D
regulation of mitotic cell cycle	65	3	1.96	0.02	0.043	Process	6	FOXG1,MAP2K3,SAE1
T cell receptor signaling pathway	98	4	1.98	0.02	0.043	Process	11	THY1,PRKD2,VASP,PDE4D
signal transduction	986	23	1.93	0.025	0.052	Process	4	STAT6,PER2,CCL2,MAP2K3,TIE1,IGFBP2,TENM4,AKT2,NDRG4,GRIN2D,CALM3,PPP5C,ARNTL2,DLG4,CRABP1,CRABP2,TOM1L2,MX1,NPHP4,IL11RA,MCC,WWP1,RASSF8
positive regulation of neuron projection development	70	3	1.81	0.025	0.052	Process	8	BCL11A,UBE2V2,NDRG4
negative regulation of transforming growth factor beta receptor signaling pathway	70	3	1.81	0.025	0.052	Process	8	TP53,NKX2-1,CD109
epithelial cell differentiation	69	3	1.84	0.024	0.052	Process	6	ACADVL,ALDOC,SPINK5
positive regulation of peptidyl-serine phosphorylation	70	3	1.81	0.025	0.052	Process	11	SPRY2,PRKD2,PHIP
wound healing	71	3	1.78	0.026	0.054	Process	5	COL3A1,TNC,FGFR1OP2
negative regulation of endopeptidase activity	144	5	1.82	0.028	0.055	Process	10	CD109,A2M,SERPINA5,PI3,SPINK5
neural tube closure	73	3	1.73	0.029	0.056	Process	9	FZD3,VASP,LHX2
positive regulation of cell migration	146	5	1.78	0.029	0.056	Process	8	LEF1,ACTN4,MYLK,DIAPH1,LGR6
T cell costimulation	73	3	1.73	0.029	0.056	Process	10	DPP4,CD24,RICTOR
positive regulation of transcription, DNA-templated	499	13	1.84	0.029	0.056	Process	8	TP53,SERTAD1,NKX2-1,LEF1,SOX18,MAP2K3,RAI1,LHX2,PHIP,MED4,ARNTL2,ZNF423,NAA16
collagen catabolic process	74	3	1.7	0.03	0.058	Process	5	COL2A1,COL3A1,COL9A3
positive regulation of cell growth	75	3	1.67	0.031	0.06	Process	6	LEF1,AKAP6,SLC9A1
palate development	77	3	1.62	0.034	0.064	Process	4	LEF1,COL2A1,CHD7
positive regulation of peptidyl-tyrosine phosphorylation	78	3	1.6	0.036	0.066	Process	11	TP53,RICTOR,IL6R
epidermal growth factor receptor signaling pathway	198	6	1.63	0.039	0.072	Process	10	SPRY2,KRAS,SHC1,RICTOR,CALM3,AGO2
lung development	81	3	1.53	0.04	0.073	Process	4	NKX2-1,ZFPM2,PDE4D
MAPK cascade	82	3	1.5	0.042	0.075	Process	7	KRAS,CCL2,SHC1
vesicle-mediated transport	120	4	1.53	0.043	0.075	Process	5	VAMP2,KDELR1,KIF1B,NCALD
negative regulation of apoptotic process	477	12	1.64	0.042	0.075	Process	8	TP53,APIP,MSX2,LEF1,SPRY2,PRKDC,PHIP,SLC9A1,TSC22D1,SYCP2,CD59,NAA16
phosphatidylinositol-mediated signaling	120	4	1.53	0.043	0.075	Process	8	RICTOR,AGO2,CA8,GSN
positive regulation of defense response to virus by host	122	4	1.5	0.045	0.077	Process	9	MTSS1,MYLK,FXR2,TRAF3IP2
potassium ion transport	84	3	1.46	0.045	0.077	Process	9	GJA5,KCNK1,SLC12A8
regulation of small GTPase mediated signal transduction	122	4	1.5	0.045	0.077	Process	8	A2M,ARHGAP26,TIAM1,ARHGAP6
peptidyl-serine phosphorylation	85	3	1.43	0.046	0.079	Process	9	PRKDC,PRKD2,RICTOR
regulation of insulin secretion	86	3	1.41	0.048	0.081	Process	9	PER2,PDE3B,VAMP2
glucose metabolic process	125	4	1.45	0.049	0.082	Process	8	ALDOC,AKT2,CALM3,ENO3
regulation of cell shape	125	4	1.45	0.049	0.082	Process	4	CCL2,SEMA3E,PHIP,DIAPH1
anterior/posterior pattern specification	87	3	1.39	0.05	0.082	Process	7	HOXB3,HOXD9,MSX2
phototransduction, visible light	91	3	1.31	0.057	0.091	Process	8	APOE,ABCA4,CALM3
cell migration	172	5	1.39	0.057	0.091	Process	6	NDEL1,CD24,SLC9A1,TIAM1,SPATA13
ephrin receptor signaling pathway	91	3	1.31	0.057	0.091	Process	9	EFNB1,SDCBP,TIAM1
transforming growth factor beta receptor signaling pathway	133	4	1.31	0.061	0.097	Process	8	TP53,CCL2,E2F5,COL3A1
activation of MAPK activity	103	3	1.08	0.082	0.12	Process	13	SHC1,MAP2K3,LPAR3
osteoblast differentiation	101	3	1.11	0.077	0.12	Process	5	MSX2,LEF1,TNC
muscle contraction	102	3	1.1	0.08	0.12	Process	6	CALM3,MYLK,SSPN
endoplasmic reticulum unfolded protein response	100	3	1.13	0.075	0.12	Process	6	CCL2,SHC1,ACADVL
Fc-epsilon receptor signaling pathway	186	5	1.21	0.077	0.12	Process	9	KRAS,SHC1,RICTOR,CALM3,AGO2
cellular response to hypoxia	103	3	1.08	0.082	0.12	Process	5	TP53,RGCC,SLC9A1
neuron migration	106	3	1.03	0.089	0.13	Process	7	NKX2-1,NDEL1,FZD3
heart development	148	4	1.09	0.087	0.13	Process	4	ZFPM2,SHC1,PRKDC,COL3A1
positive regulation of GTPase activity	436	10	1.19	0.089	0.13	Process	8	NDEL1,THY1,LIMS1,CYTH2,ARHGAP26,TIAM1,PREX2,ARHGAP6,SPATA13,PLEKHG1
defense response to virus	149	4	1.07	0.089	0.13	Process	4	EXOSC5,MX1,IFI44L,IFIT1
potassium ion transmembrane transport	106	3	1.03	0.089	0.13	Process	10	KCNH2,KCNK1,KCNE3
receptor-mediated endocytosis	151	4	1.05	0.093	0.14	Process	7	APOE,COL3A1,SUSD2,SBSPON
response to virus	109	3	0.975	0.096	0.14	Process	6	HNRNPUL1,MX1,IFIT1
positive regulation of cytosolic calcium ion concentration	115	3	0.878	0.11	0.15	Process	12	LPAR3,CD24,DLG4
central nervous system development	112	3	0.925	0.1	0.15	Process	6	COL2A1,CHD7,WWP1
cell differentiation	450	10	1.09	0.1	0.15	Process	5	TP53,ZFPM2,JAG2,THSD7A,FOXB1,NDRG4,ETV1,ZNF423,ILDR2,NXN
leukocyte migration	115	3	0.878	0.11	0.15	Process	3	KRAS,SHC1,PROCR
synaptic transmission	414	9	0.965	0.12	0.17	Process	6	KCNH2,LPAR3,GRIN2D,CALM3,VAMP2,DLG4,SDCBP,KCNK1,NCALD
peptidyl-tyrosine phosphorylation	120	3	0.801	0.12	0.17	Process	9	SHC1,MAP2K3,TIE1
protein polyubiquitination	126	3	0.714	0.14	0.19	Process	11	UBE2V2,UBR5,SHPRH
anatomical structure morphogenesis	125	3	0.728	0.14	0.19	Process	3	FOXB1,CPM,TPD52
neurotrophin TRK receptor signaling pathway	276	6	0.784	0.15	0.2	Process	8	KRAS,SHC1,RICTOR,CALM3,AGO2,TIAM1
positive regulation of NF-kappaB transcription factor activity	130	3	0.658	0.15	0.2	Process	13	KRAS,PRKD2,IL6R
positive regulation of ERK1 and ERK2 cascade	129	3	0.672	0.15	0.2	Process	12	SPRY2,PRKD2,NDRG4
DNA replication	132	3	0.631	0.16	0.21	Process	7	MCM4,NFIA,NFIB
activation of mitophagy in response to mitochondrial depolarization	133	3	0.617	0.16	0.21	Process	6	PRKD2,MYLK,BOC
endocytosis	135	3	0.591	0.17	0.22	Process	6	STEAP2,CYTH2,ANKFY1
cellular nitrogen compound metabolic process	187	4	0.605	0.18	0.23	Process	4	BCAT1,ETHE1,APIP,HGD
visual perception	191	4	0.562	0.19	0.24	Process	8	SIX3,COL2A1,ABCA4,IMPG2
cell proliferation	355	7	0.583	0.2	0.26	Process	3	TP53,BCAT1,DACH1,AURKB,UBE2V2,UBR5,EMP1
multicellular organismal development	412	8	0.58	0.21	0.27	Process	4	TP53,RERE,MBNL3,SIAH3,CRABP1,EMP1,HOXD4,TSHZ2
G1/S transition of mitotic cell cycle	153	3	0.37	0.23	0.28	Process	8	CCNE2,BCAT1,MCM4
mitotic cell cycle	418	8	0.538	0.22	0.28	Process	5	CCNE2,MCM4,TUBA4A,CENPJ,AURKB,NIPBL,NDEL1,E2F5
regulation of cell proliferation	153	3	0.37	0.23	0.28	Process	5	SIX3,STAT6,JAG2
negative regulation of canonical Wnt signaling pathway	152	3	0.381	0.22	0.28	Process	9	LEF1,NPHP4,MCC
positive regulation of I-kappaB kinase/NF-kappaB signaling	155	3	0.347	0.23	0.29	Process	9	S100A4,TRAF3IP2,PPP5C
membrane organization	159	3	0.302	0.25	0.3	Process	4	AKT2,CALM3,VAMP2
phospholipid metabolic process	161	3	0.28	0.25	0.31	Process	6	NKX2-1,MGLL,PTDSS1
apoptotic process	607	11	0.448	0.26	0.31	Process	6	TP53,APIP,CKAP2,ALDOC,SULF1,AKT2,EIF5A,GSN,MX1,UNC5C,KIF1B
nervous system development	274	5	0.315	0.27	0.32	Process	6	DLG4,ARHGAP26,ZNF423,PTN,NRN1
positive regulation of apoptotic process	277	5	0.29	0.28	0.33	Process	8	TP53,PRKDC,TSC22D1,UNC5C,TIAM1
cell surface receptor signaling pathway	170	3	0.184	0.29	0.34	Process	6	CCL2,CD59,LIFR
cellular response to DNA damage stimulus	178	3	0.103	0.31	0.37	Process	5	TP53,NIPBL,UBR5
DNA repair	293	5	0.162	0.32	0.38	Process	4	UBR5,SHPRH,PRKDC,XRCC1,PPP5C
intracellular protein transport	239	4	0.105	0.33	0.39	Process	6	KDELR1,RAB6B,SYTL1,TOM1L2
regulation of transcription from RNA polymerase II promoter	360	6	0.119	0.35	0.4	Process	11	STAT6,RAI1,FOXB1,MED21,MED4,ARNTL2
negative regulation of cell proliferation	381	6	-0.0225	0.4	0.46	Process	6	TP53,MSX2,SPRY2,IGFBP7,RGCC,SLC9A3R1
regulation of apoptotic process	208	3	-0.17	0.42	0.48	Process	7	TP53,MAP2K3,ACTN4
cellular protein metabolic process	637	10	-0.0395	0.43	0.49	Process	6	TUBA4A,CCL2,SHC1,EIF3E,IGFBP2,ACADVL,VAMP2,EIF5A,NPL,SAE1
immune response	338	5	-0.163	0.45	0.51	Process	3	IFI6,SUSD2,SBSPON,PROCR,IFI44L
protein phosphorylation	472	7	-0.187	0.48	0.54	Process	7	AURKB,CCL2,PRKD2,AKT2,MYLK,LIMK2,STK38L
organelle organization	292	4	-0.302	0.5	0.56	Process	4	TUBA4A,CENPJ,ARL13B,NPHP4
intracellular signal transduction	365	5	-0.339	0.52	0.58	Process	6	PRKD2,TRAF3IP2,STK38L,SDCBP,DGKA
response to drug	299	4	-0.351	0.52	0.58	Process	4	IGFBP2,XRCC1,ENO3,SLC9A1
transcription initiation from RNA polymerase II promoter	240	3	-0.423	0.53	0.59	Process	12	TP53,E2F5,MED4
transport	306	4	-0.398	0.54	0.59	Process	4	ABCA4,CRABP1,CRABP2,LAPTM4B
carbohydrate metabolic process	337	4	-0.597	0.62	0.68	Process	4	ALDOC,CALM3,ENO3,SLC9A1
ion transmembrane transport	271	3	-0.64	0.63	0.68	Process	7	GRIN2D,WWP1,FXYD6
protein transport	343	4	-0.633	0.64	0.69	Process	5	ACTN4,VAMP2,SELENBP1,XPO4
proteolysis	433	5	-0.733	0.69	0.73	Process	6	NDEL1,DPP4,CPM,KLK5,TRABD2B
innate immune response	770	10	-0.661	0.68	0.73	Process	4	STAT6,KRAS,SHC1,MAP2K3,PRKDC,RICTOR,CALM3,AGO2,MX1,CD59
transmembrane transport	641	8	-0.705	0.69	0.74	Process	4	GJA5,ABCA4,SLC9A1,ADD2,SLC26A7,SLC12A8,WWP1,FXYD6
oxidation-reduction process	578	7	-0.74	0.7	0.74	Process	4	ME3,GMPR,HGD,STEAP2,OXR1,NXN,LOXL1
post-translational protein modification	311	3	-0.889	0.73	0.77	Process	8	EIF5A,NPL,SAE1
cell division	318	3	-0.93	0.75	0.78	Process	4	CCNE2,CENPJ,SYCP2
protein ubiquitination	324	3	-0.965	0.76	0.79	Process	10	UBE2V2,WWP1,SAE1
inflammatory response	334	3	-1.02	0.78	0.81	Process	5	CCL2,MAP2K3,MGLL
G-protein coupled receptor signaling pathway	863	10	-1.04	0.81	0.83	Process	7	CCL2,APOE,FZD3,CALM3,LPAR4,LPAR6,ADGRL3,GPR162,LGR6,PREX2
spermatogenesis	356	3	-1.14	0.82	0.83	Process	7	JAG2,LIMK2,SERPINA5
biological_process	650	7	-1.07	0.82	0.83	Process	1	AUTS2,STRN4,TM7SF3,FXYD6,PLEKHA4,EPPK1,KBTBD7
metabolic process	606	6	-1.2	0.85	0.86	Process	2	TRABD2B,RAB6B,MX1,KIF1B,TNNT2,ARL4D
gene expression	843	8	-1.53	0.92	0.93	Process	5	TP53,EIF3E,SMG9,E2F5,EXOSC5,HNRNPUL1,MED4,AGO2
viral process	555	4	-1.67	0.94	0.94	Process	4	TP53,SHC1,MFGE8,KRT8

## Sheet: PaclitaxRes.downGOBP
name	nAnno	nOverlap	zscore	pvalue	adjp	namespace	distance	members
nervous system development	274	5	5.01	8.6e-05	0.0006	Process	6	SEMA5A,NDN,DPYSL2,BEX1,ZC4H2
nucleosome assembly	130	3	4.51	0.0004	0.0012	Process	7	H2AFY2,HIST1H1D,NAP1L3
negative regulation of cell proliferation	381	5	3.98	0.00051	0.0012	Process	6	CDKN2C,NDN,SKAP2,LDOC1,P3H2
cell cycle	187	3	3.55	0.0016	0.0027	Process	4	GSPT2,BEX2,CCNDBP1
axon guidance	379	3	1.99	0.019	0.026	Process	14	SEMA5A,PRNP,DPYSL2
signal transduction	986	4	0.855	0.12	0.14	Process	4	DPYSL2,IRS2,SKAP2,GKAP1
innate immune response	770	3	0.662	0.15	0.15	Process	4	IRS2,CD55,TRIM14

## Sheet: siggenes_PaclitaxRes_0620
gene.names	direction Level A vs Level B
PLEKHA4	up
ALDOC	up
S100A16	up
PNMA8A	up
TPD52	up
EFNB1	up
GPR162	up
KRT8	up
PDZD2	up
PI3	up
LEMD1	up
SUSD2	up
ACTN4	up
ZMYND8	up
BOC	up
AGO2	up
NFIA	up
AUTS2	up
S100A4	up
CD24	up
EIF3E	up
KCNH2	up
CACNA2D1	up
THSD7A	up
BCAT1	up
MYLK	up
CD82	up
IGFBP2	up
SAT2	up
EXOSC5	up
IL17RD	up
APIP	up
HOXB3	up
ETHE1	up
ETV1	up
IFI27	up
SEMA3E	up
SOX5	up
FRMD4B	up
TRPS1	up
XPO4	up
PAPOLG	up
RICTOR	up
CA8	up
CCDC122	up
IFIT1	up
NUDT15	up
IFI6	up
IFI44L	up
MX1	up
LAMC2	up
ADGRL3	up
FLNC	up
CKAP2	up
CCDC18	up
ZC3H13	up
NFIB	up
APOC1	up
KIF1B	up
TSC22D1	up
MED4	up
FOXB1	up
TUBA4A	up
CPNE4	up
SCEL	up
PROCR	up
RAB6B	up
LYPLA1	up
MAP2K3	up
SHPRH	up
XRCC1	up
KBTBD7	up
RAI1	up
ZFHX2	up
SOX18	up
SSPN	up
KLK5	up
TENM4	up
HRCT1	up
PREX2	up
PDE3B	up
A2M	up
CALM3	up
ME3	up
LGR6	up
LPAR4	up
GRIN2D	up
LPAR6	up
TNNT2	up
NXPH2	up
PLEKHG1	up
E2F5	up
LPAR3	up
CYTH2	up
RERE	up
HEY2	up
GRWD1	up
STRN4	up
FKBP5	up
TP53	up
SULF1	up
DACH1	up
LIMK2	up
AKT2	up
VAMP2	up
AKAP6	up
MBNL3	up
PPP5C	up
SERTAD1	up
TNNC1	up
HIVEP2	up
PER2	up
ZNF428	up
SMG9	up
FZD3	up
LRRC61	up
IL33	up
NKX2-1	up
ENO3	up
SIX3	up
FXR2	up
CIC	up
PRKD2	up
SLC12A8	up
JAG2	up
NRN1	up
SBSPON	up
GJA5	up
CD59	up
SERPINA5	up
IRGQ	up
NRP2	up
ANKRD46	up
ARL13B	up
ZBED2	up
BTN2A2	up
MSX2	up
THY1	up
SIAH3	up
UNC5C	up
CDH6	up
DMAC2	up
ARNTL2	up
DIAPH1	up
EMP1	up
UBE2V2	up
CHD7	up
NAA16	up
RGCC	up
TIAM1	up
BCL11A	up
COL2A1	up
MTSS1	up
KCNK1	up
NDRG4	up
SPINK5	up
CCNE2	up
NPHP4	up
GMPR	up
TMEM169	up
MCM4	up
PHIP	up
VASP	up
PDE4D	up
LEF1	up
NPL	up
STEAP2	up
TIE1	up
EPPK1	up
WWP1	up
PRTFDC1	up
SHC1	up
CRABP1	up
ILDR2	up
SORCS1	up
MGLL	up
AURKB	up
CPM	up
REXO1	up
CD109	up
PTN	up
IMPG2	up
DPP4	up
SPAAR	up
KDELR1	up
SPRY2	up
TRABD2B	up
HNRNPUL1	up
SYTL1	up
SYCP2	up
CMTM3	up
TM7SF3	up
LHX2	up
LIFR	up
STK38L	up
COL3A1	up
FGFR1OP2	up
TSPAN18	up
RASSF8	up
SELENBP1	up
ABCA4	up
FXYD6	up
FOXG1	up
CASC1	up
KRAS	up
ABTB2	up
ARL4D	up
MED21	up
HOXD8	up
LOXL1	up
DLG4	up
SELENOM	up
TNC	up
GUCY1B1	up
MTFR1	up
ANKFY1	up
ADD2	up
FAT2	up
ZFPM2	up
BTBD8	up
ETFRF1	up
HGD	up
EMC2	up
NCALD	up
PTDSS1	up
ACADVL	up
SLC26A7	up
OSMR	up
PIP4P2	up
SPATA13	up
LAPTM4B	up
EIF5A	up
SLC9A3R1	up
CNFN	up
FRMD8	up
CCL2	up
CENPJ	up
PRKDC	up
ARHGAP26	up
COL9A3	up
NIPBL	up
LIMS1	up
NMNAT2	up
MFGE8	up
CRABP2	up
PDLIM4	up
TSHZ2	up
RIPOR2	up
AFAP1L1	up
ARHGAP6	up
DGKA	up
NDEL1	up
STAT6	up
UBR5	up
HOXD9	up
EGFL7	up
SLC9A1	up
IL11RA	up
KANK4	up
CCDC146	up
PTPN13	up
STRN3	up
ZNF423	up
IQCA1	up
TOM1L2	up
CCDC80	up
IGFBP7	up
SDCBP	up
EGFLAM	up
PDLIM1	up
NHSL2	up
RBPMS	up
GRB10	up
GSN	up
TRAF3IP2	up
IL6R	up
MAP7D1	up
MCC	up
OXR1	up
HOXD4	up
ITM2C	up
NXN	up
LRCH1	up
KCNE3	up
SAE1	up
BAZ1A	up
APOE	up
SELENOW	up
PNMA2	down
TMSB15A	down
CHPT1	down
2009-03-01	down
SLC39A6	down
TPGS2	down
ZC4H2	down
PQLC2L	down
PLAAT3	down
SEMA5A	down
DPYSL2	down
H2AFY2	down
ELAVL2	down
ZFP28	down
CCNDBP1	down
CDKN2C	down
LRRCC1	down
VPS35L	down
GM2A	down
NAP1L3	down
ZNF667	down
ERAP2	down
GSPT2	down
EMC10	down
NDN	down
P3H2	down
PRNP	down
MTUS1	down
TAOK3	down
DTD1	down
LDOC1	down
TCEAL4	down
TRIM14	down
IRS2	down
ZNF382	down
HOXA3	down
CCDC181	down
CROT	down
TDRP	down
JPH1	down
SMIM26	down
ZNF415	down
ZNF468	down
CD55	down
PPM1H	down
HOXA4	down
ARMCX1	down
TTC39C	down
SKAP2	down
ZNF257	down
BEX1	down
BEX5	down
GRIP1	down
ZNF568	down
BEX2	down
ZNF793	down
GKAP1	down
DCAF12L2	down
HIST1H1D	down
ZDHHC2	down
DHX32	down
NAA20	down

## Sheet: AttenReplicStress.upGOBP
name	nAnno	nOverlap	zscore	pvalue	adjp	namespace	distance	members
neuron differentiation	88	7	6.06	6.9e-06	0.00074	Process	6	SOX11,FZD8,RUNX1,CHRDL1,SMARCA1,NRBP2,PTPRD
cellular response to cadmium ion	15	3	6.9	2e-05	0.0011	Process	7	MT1X,GSN,MT1E
regulation of sodium ion transmembrane transporter activity	18	3	6.23	4.3e-05	0.0015	Process	9	PTPN3,FXYD6,FXYD5
cell migration	172	8	4.38	0.00015	0.0039	Process	6	NRG1,PAK1,EPHB3,MDK,CD24,EMP2,SLC9A1,FAT1
positive regulation of transcription, DNA-templated	499	15	4.01	0.00018	0.0039	Process	8	FHL2,SIX1,SOX11,NR2F2,NSD1,RUNX1,MDK,LHX2,SMARCD3,ENY2,SMARCA1,TCF4,MED30,MDFIC,ATAD2
regulation of sensory perception of pain	27	3	4.9	0.00023	0.0041	Process	8	TMEM100,GRIN2A,SLC9A1
protein destabilization	30	3	4.59	0.00035	0.0053	Process	5	GSN,DERL1,RNF139
aging	129	6	3.79	0.00067	0.0065	Process	4	ASS1,FOXG1,IGFBP2,SERPING1,TIMP1,GSN
negative regulation of protein catabolic process	33	3	4.32	0.00051	0.0065	Process	7	NRG1,GRIN2A,SERPINE2
response to drug	299	10	3.64	0.00062	0.0065	Process	4	ASS1,CDKN1A,VAV3,IGFBP2,MDK,ABAT,GRIN2A,SLC9A1,FABP3,LGALS1
ephrin receptor signaling pathway	91	5	3.94	0.00059	0.0065	Process	9	PAK1,EPHB2,EPHB3,VAV3,KALRN
negative regulation of viral genome replication	37	3	4.01	0.00079	0.007	Process	9	IFITM2,BST2,APOBEC3C
cell adhesion	427	12	3.32	0.0012	0.0085	Process	3	EGFL7,ACKR3,EMP2,NINJ1,ROBO1,SPON1,ADGRE5,CX3CL1,FAT1,CTNND2,PPFIBP1,HAPLN3
embryo implantation	40	3	3.81	0.0011	0.0085	Process	4	RXRA,FBLN1,EMP2
positive regulation of cell adhesion	41	3	3.74	0.0012	0.0085	Process	6	NRG1,VAV3,TGM2
axon guidance	379	11	3.29	0.0013	0.0088	Process	14	PAK1,EPHB2,EPHB3,VAV3,CD24,LHX2,ROBO1,DLG4,KALRN,CACNB3,SEMA6C
skeletal muscle tissue development	45	3	3.51	0.0017	0.01	Process	7	SIX1,NR2F2,SVIL
positive regulation of fibroblast proliferation	48	3	3.35	0.0021	0.013	Process	7	CDKN1A,FBLN1,S100A6
angiogenesis	213	7	2.99	0.003	0.015	Process	4	FZD8,EPHB2,EPHB3,VAV3,EGFL7,TMEM100,ACKR3
kidney development	84	4	3.15	0.0027	0.015	Process	4	ASS1,SIX1,SOX11,TNS2
learning	53	3	3.12	0.003	0.015	Process	8	EPHB2,DLG4,CTNND2
response to ethanol	89	4	3	0.0034	0.017	Process	6	SPARC,ABAT,GRIN2A,GSN
negative regulation of transcription from RNA polymerase II promoter	669	15	2.77	0.004	0.018	Process	12	FHL2,FOXG1,HOXD8,NFIA,NFIC,RXRA,SIX1,SOX11,STAT6,NR2F2,FZD8,ZHX1,ZBTB20,NSD1,MTDH
vasculogenesis	60	3	2.83	0.0048	0.02	Process	6	EGFL7,TMEM100,ACKR3
inner ear morphogenesis	59	3	2.87	0.0045	0.02	Process	7	FOXG1,SIX1,EPHB2
response to glucocorticoid	63	3	2.72	0.0057	0.023	Process	8	SPARC,IGFBP2,MDK
positive regulation of angiogenesis	103	4	2.64	0.0063	0.025	Process	8	MTDH,RUNX1,HSPB1,CX3CL1
regulation of cell growth	72	3	2.44	0.009	0.031	Process	5	IGFBP2,IGFBP5,FAM107A
negative regulation of protein kinase activity	70	3	2.5	0.0082	0.031	Process	11	HSPB1,CAMK2N1,UBASH3B
wound healing	71	3	2.47	0.0086	0.031	Process	5	NRG1,PAK1,FGFR1OP2
positive regulation of I-kappaB kinase/NF-kappaB signaling	155	5	2.47	0.0085	0.031	Process	9	MTDH,S100A4,TGM2,LGALS1,BST2
T cell costimulation	73	3	2.41	0.0095	0.032	Process	10	PAK1,CD24,LGALS1
response to estradiol	74	3	2.38	0.0099	0.032	Process	6	ASS1,NR2F2,IGFBP2
integrin-mediated signaling pathway	81	3	2.19	0.014	0.039	Process	7	VAV3,FBLN1,ITGB5
nervous system development	274	7	2.24	0.013	0.039	Process	6	NRG1,EPHB2,MDK,NINJ1,ROBO1,DLG4,KALRN
positive regulation of neuron differentiation	80	3	2.22	0.013	0.039	Process	11	FOXG1,SOX11,TCF4
positive regulation of protein kinase B signaling	79	3	2.24	0.012	0.039	Process	9	MTDH,NRG1,IGFBP5
platelet degranulation	83	3	2.14	0.015	0.04	Process	9	SPARC,SERPING1,TIMP1
negative regulation of neuron apoptotic process	126	4	2.17	0.014	0.04	Process	8	NES,SIX1,MDK,NRBP2
negative regulation of cell migration	88	3	2.02	0.018	0.048	Process	8	EGFL7,IGFBP5,BST2
homophilic cell adhesion via plasma membrane adhesion molecules	141	4	1.92	0.022	0.058	Process	6	ROBO1,FAT1,FAT2,CLSTN2
negative regulation of endopeptidase activity	144	4	1.87	0.024	0.059	Process	10	SERPING1,TIMP1,BST2,SERPINE2
single organismal cell-cell adhesion	96	3	1.85	0.024	0.059	Process	5	CD24,FAT1,CTNND2
intracellular signal transduction	365	8	1.93	0.024	0.059	Process	6	NRG1,IGFBP5,TNS2,HSPB1,KALRN,HUNK,WNK2,DGKA
peptidyl-tyrosine dephosphorylation	99	3	1.79	0.026	0.062	Process	9	UBASH3B,PTPN3,PTPRD
response to hypoxia	155	4	1.71	0.032	0.072	Process	4	PAK1,ABAT,KCNMA1,CD24
signal transduction	986	17	1.81	0.031	0.072	Process	4	STAT6,NR2F2,SPARC,IGFBP2,IGFBP5,MDK,DLG4,KALRN,HUNK,CRABP2,SLC22A17,LRP12,LGALS1,CTNND2,S100A6,SH3BP2,RASSF8
platelet activation	212	5	1.7	0.034	0.075	Process	5	SPARC,VAV3,SERPING1,TIMP1,DGKA
vascular endothelial growth factor receptor signaling pathway	108	3	1.62	0.035	0.075	Process	9	PAK1,VAV3,HSPB1
response to virus	109	3	1.6	0.036	0.076	Process	6	HSPB1,IFITM2,BST2
central nervous system development	112	3	1.55	0.039	0.08	Process	6	NES,RUNX1,MAL
positive regulation of apoptotic process	277	6	1.64	0.039	0.08	Process	8	VAV3,KCNMA1,GRIN2A,TGM2,KALRN,BIN1
positive regulation of cytosolic calcium ion concentration	115	3	1.5	0.042	0.085	Process	12	CD24,S1PR3,DLG4
chemotaxis	118	3	1.45	0.045	0.09	Process	4	ACKR3,CX3CL1,CMTM3
negative regulation of cell growth	120	3	1.42	0.048	0.091	Process	6	CDKN1A,BST2,SERPINE2
phosphatidylinositol-mediated signaling	120	3	1.42	0.048	0.091	Process	8	CDKN1A,NRG1,GSN
protein N-linked glycosylation via asparagine	124	3	1.36	0.053	0.099	Process	10	ST3GAL1,TUSC3,MGAT4A
DNA replication	132	3	1.24	0.063	0.11	Process	7	NFIA,NFIC,RECQL4
Notch signaling pathway	129	3	1.28	0.059	0.11	Process	7	TMEM100,MDK,DTX4
Fc-epsilon receptor signaling pathway	186	4	1.32	0.061	0.11	Process	9	CDKN1A,NRG1,PAK1,VAV3
calcium ion transmembrane transport	131	3	1.25	0.062	0.11	Process	10	GRIN2A,CACNB3,CACNA2D1
negative regulation of cell proliferation	381	7	1.31	0.069	0.12	Process	6	CDKN1A,TNS2,WNK2,FABP3,TP53I11,SERPINE2,RNF139
positive regulation of transcription from RNA polymerase II promoter	886	14	1.29	0.079	0.13	Process	12	HOXD8,NFIA,NFIC,RXRA,SIX1,SOX11,STAT6,FZD8,RUNX1,LHX2,SLC9A1,TCF4,AUTS2,ATAD2
cellular lipid metabolic process	145	3	1.07	0.083	0.14	Process	4	FHL2,RXRA,SMARCD3
protein phosphorylation	472	8	1.17	0.089	0.15	Process	7	CDKN1A,PAK1,ST3GAL1,KALRN,HUNK,FAM20C,WNK2,NRBP2
ion transport	154	3	0.959	0.098	0.15	Process	6	SLC9A1,SLC22A17,SLC26A7
synaptic transmission	414	7	1.08	0.099	0.15	Process	6	KCNH2,ABAT,KCNMA1,GRIN2A,DLG4,CACNB3,EPB41L1
neurotrophin TRK receptor signaling pathway	276	5	1.07	0.095	0.15	Process	8	CDKN1A,NRG1,VAV3,KALRN,LINGO1
defense response to virus	149	3	1.02	0.09	0.15	Process	4	IFITM2,BST2,APOBEC3C
protein autophosphorylation	161	3	0.878	0.11	0.17	Process	9	PAK1,EPHB3,WNK2
positive regulation of GTPase activity	436	7	0.943	0.12	0.19	Process	8	VAV3,KALRN,BIN1,CDC42EP4,DENND1B,PLEKHG4,ARHGEF10L
transport	306	5	0.834	0.14	0.2	Process	4	ABCA4,RBP1,GRIN2A,CACNB3,CRABP2
brain development	172	3	0.76	0.13	0.2	Process	4	NES,FOXG1,SMARCA1
extracellular matrix organization	312	5	0.789	0.14	0.21	Process	5	SPARC,FBLN1,ITGB5,TIMP1,EFEMP2
post-translational protein modification	311	5	0.797	0.14	0.21	Process	8	RAD21,ST3GAL1,TUSC3,SPON1,MGAT4A
cellular nitrogen compound metabolic process	187	3	0.611	0.16	0.23	Process	4	ASS1,PSMC3,GAMT
negative regulation of transcription, DNA-templated	472	7	0.727	0.17	0.23	Process	8	FOXG1,NR2F2,ZHX1,NRG1,MDFIC,PSPC1,MPHOSPH8
positive regulation of gene expression	194	3	0.546	0.18	0.24	Process	7	SOX11,FBLN1,GSN
negative regulation of apoptotic process	477	7	0.698	0.18	0.24	Process	8	CDKN1A,PSMC3,FHL2,MTDH,HSPB1,TIMP1,SLC9A1
multicellular organismal development	412	6	0.626	0.19	0.25	Process	4	RECQL4,TDRD9,HUNK,PCOLCE,BST2,SPATA20
blood coagulation	487	7	0.642	0.19	0.25	Process	5	SPARC,VAV3,KCNMA1,SERPING1,TIMP1,DGKA,SERPINE2
ion transmembrane transport	271	4	0.536	0.19	0.25	Process	7	GRIN2A,S100A6,FXYD6,FXYD5
transmembrane transport	641	9	0.659	0.19	0.25	Process	4	ABCA4,SLC9A1,TUSC3,SLC22A17,SLC26A7,MAL,FXYD6,MFSD2A,SLCO3A1
cell proliferation	355	5	0.494	0.22	0.27	Process	3	NRG1,EMP2,BIN1,BST2,MVP
regulation of apoptotic process	208	3	0.423	0.21	0.27	Process	7	PSMC3,PAK1,LGALS1
in utero embryonic development	215	3	0.364	0.23	0.28	Process	8	RXRA,RUNX1,TMEM100
regulation of transcription from RNA polymerase II promoter	360	5	0.462	0.23	0.28	Process	11	STAT6,NR2F2,RAD21,SMARCD3,MED30
transcription from RNA polymerase II promoter	516	7	0.485	0.23	0.28	Process	11	HOXD8,NFIA,NFIC,SIX1,SOX11,RUNX1,LHX2
innate immune response	770	10	0.442	0.26	0.31	Process	4	CDKN1A,PSMC3,STAT6,NRG1,PAK1,VAV3,SERPING1,BST2,DTX4,APOBEC3C
transcription initiation from RNA polymerase II promoter	240	3	0.171	0.29	0.34	Process	12	RXRA,TCF4,MED30
small GTPase mediated signal transduction	472	6	0.286	0.29	0.34	Process	7	PAK1,VAV3,DLG4,KALRN,ARL4C,RHPN1
viral process	555	7	0.288	0.29	0.34	Process	4	PSMC3,ACKR3,FBLN1,BIN1,MDFIC,KRT8,APOBEC3C
cell-cell signaling	248	3	0.113	0.31	0.36	Process	4	ADGRE5,BST2,FAT1
protein transport	343	4	0.0567	0.35	0.4	Process	5	ENY2,MVP,SELENBP1,DENND1B
cytokine-mediated signaling pathway	264	3	0.00349	0.35	0.4	Process	7	CX3CL1,IFITM2,BST2
apoptotic process	607	7	0.0453	0.38	0.42	Process	6	PSMC3,SIX1,PAK1,RAD21,GSN,LGALS1,MAL
spermatogenesis	356	4	-0.0189	0.38	0.42	Process	7	TDRD9,GAMT,SPATA20,KHDRBS3
cell differentiation	450	5	-0.0467	0.4	0.44	Process	5	ZHX1,MDK,TDRD9,MAL,SPATA20
cellular protein metabolic process	637	7	-0.0857	0.44	0.47	Process	6	RAD21,IGFBP2,IGFBP5,ST3GAL1,TUSC3,SPON1,MGAT4A
protein ubiquitination	324	3	-0.358	0.5	0.54	Process	10	DTX4,RNF139,FBXO32
immune response	338	3	-0.433	0.54	0.57	Process	3	ADGRE5,CX3CL1,IFITM2
positive regulation of cell proliferation	437	4	-0.438	0.56	0.58	Process	6	SOX11,S1PR3,EMP2,TIMP1
biological_process	650	6	-0.519	0.61	0.63	Process	1	ZMYM2,AUTS2,TM7SF3,FXYD6,NYNRIN,TMEM107
mitotic cell cycle	418	3	-0.815	0.7	0.72	Process	5	CDKN1A,PSMC3,RAD21
metabolic process	606	4	-1.12	0.82	0.84	Process	2	IFT27,KIFC2,ARL4C,SPATA20
G-protein coupled receptor signaling pathway	863	6	-1.25	0.86	0.87	Process	7	FZD8,ACKR3,S1PR3,ADGRE5,ADGRB2,ADGRF1
gene expression	843	5	-1.53	0.92	0.92	Process	5	PSMC3,RXRA,HSPB1,MED30,TDRD9

## Sheet: AttenReplicStress.downGOBP
name	nAnno	nOverlap	zscore	pvalue	adjp	namespace	distance	members
embryonic skeletal system morphogenesis	43	5	7.32	2.7e-06	0.00028	Process	9	COL11A1,MYCN,HOXA3,HOXA5,HOXA4
chondrocyte development	15	3	7.7	9e-06	0.00035	Process	7	COL11A1,FGF18,SULF2
lung development	81	6	6.09	1e-05	0.00035	Process	4	LIPA,PDPN,MYCN,FGF18,LOX,ALDH1A2
cell morphogenesis	54	4	4.97	0.00014	0.0021	Process	6	SMARCA4,LIPA,PDPN,STRADB
negative regulation of endothelial cell proliferation	28	3	5.4	0.00012	0.0021	Process	8	GJA1,CAV2,PTPRM
anterior/posterior pattern specification	87	5	4.7	0.00016	0.0021	Process	7	HOXA3,ALDH1A2,HOXA5,HOXA1,HOXA4
pituitary gland development	27	3	5.52	0.00011	0.0021	Process	7	SOX2,SOX3,ALDH1A2
positive regulation of neuron differentiation	80	5	4.97	9.9e-05	0.0021	Process	11	SOX2,BEND6,NRCAM,DMD,IL6
cell cycle arrest	134	6	4.3	0.00025	0.0025	Process	6	CDK6,SOX2,STRADB,CXCL8,PRKAA2,RPRM
T cell differentiation in thymus	34	3	4.8	0.00027	0.0025	Process	11	CDK6,LIG4,B2M
cellular response to interleukin-1	33	3	4.89	0.00024	0.0025	Process	7	ANKRD1,CXCL8,IL6
lung alveolus development	38	3	4.48	0.00041	0.0036	Process	4	SOX2,PDPN,HOXA5
negative regulation of osteoblast differentiation	39	3	4.41	0.00046	0.0037	Process	7	CDK6,ID2,SOX2
central nervous system development	112	5	3.91	0.00062	0.0046	Process	6	SOX3,NRCAM,LIG4,NDN,RELN
actin cytoskeleton reorganization	47	3	3.9	0.00093	0.0061	Process	7	FER,CXADR,PHACTR1
protein oligomerization	47	3	3.9	0.00093	0.0061	Process	7	GJA1,CAV2,SNX2
negative regulation of neuron differentiation	50	3	3.74	0.0012	0.0073	Process	11	ID2,SOX2,SOX3
generation of precursor metabolites and energy	52	3	3.64	0.0014	0.008	Process	4	SLC25A4,RUNX1T1,OGDH
multicellular organismal development	412	10	3.21	0.0016	0.0085	Process	4	ID2,GCNT2,DDX25,ST6GAL2,MRAS,HOXA1,HOXA9,DKK2,BICC1,TMEM88
forebrain development	54	3	3.55	0.0016	0.0085	Process	4	SMARCA4,SOX2,ZIC5
muscle organ development	93	4	3.4	0.0017	0.0087	Process	5	DMD,MRAS,NEB,EID2
regulation of immune response	97	4	3.29	0.0021	0.01	Process	5	B2M,HLA-A,HLA-C,CXADR
neuron migration	106	4	3.06	0.0031	0.014	Process	7	NRCAM,GJA1,NDN,RELN
cellular response to tumor necrosis factor	65	3	3.1	0.0031	0.014	Process	7	ANKRD1,CXCL8,IL6
positive regulation of MAPK cascade	68	3	3	0.0037	0.015	Process	9	SOX2,CAV2,IL6
positive regulation of neuron projection development	70	3	2.93	0.0041	0.016	Process	8	ANKRD1,RELN,DMD
mitochondrion organization	73	3	2.84	0.0047	0.018	Process	5	CAV2,PRKAA2,CXADR
antigen processing and presentation of exogenous peptide antigen via MHC class I, TAP-dependent	75	3	2.78	0.0052	0.019	Process	7	B2M,HLA-A,HLA-C
autophagy	79	3	2.66	0.0063	0.019	Process	5	NHLRC1,PRKAA2,DRAM1
anatomical structure morphogenesis	125	4	2.66	0.0062	0.019	Process	3	FGF18,FOXQ1,HOXA1,HOXA4
extracellular matrix disassembly	120	4	2.76	0.0052	0.019	Process	5	TLL1,COL11A1,ADAMTS5,COL7A1
multicellular organism growth	77	3	2.72	0.0057	0.019	Process	4	PEG3,HOXA5,GPD2
antigen processing and presentation of exogenous peptide antigen via MHC class I	79	3	2.66	0.0063	0.019	Process	6	B2M,HLA-A,HLA-C
interferon-gamma-mediated signaling pathway	77	3	2.72	0.0057	0.019	Process	8	B2M,HLA-A,HLA-C
positive regulation of NF-kappaB transcription factor activity	130	4	2.56	0.0073	0.022	Process	13	CTH,FER,TERF2IP,IL6
negative regulation of cell proliferation	381	8	2.41	0.0093	0.026	Process	6	CDK6,CXCL8,ALDH1A2,NDN,IL6,TAF6,NEURL1,PKP2
extracellular matrix organization	312	7	2.44	0.0088	0.026	Process	5	SMARCA4,TLL1,COL11A1,LOX,DMD,ADAMTS5,COL7A1
cellular response to lipopolysaccharide	88	3	2.43	0.0091	0.026	Process	6	ANKRD1,CXCL8,IL6
homophilic cell adhesion via plasma membrane adhesion molecules	141	4	2.37	0.01	0.027	Process	6	DSC3,PTPRM,PCDHA10,PCDH17
regulation of gene expression	91	3	2.36	0.01	0.027	Process	6	CDK6,SOX2,STXBP5
osteoblast differentiation	101	3	2.15	0.015	0.031	Process	5	TP53INP2,SOX2,GJA1
energy reserve metabolic process	101	3	2.15	0.015	0.031	Process	6	SLC25A4,GNG11,PRKAA2
ion transport	154	4	2.17	0.014	0.031	Process	6	SLC7A7,SLC12A3,SLC1A1,CLDN15
nervous system development	274	6	2.19	0.014	0.031	Process	6	PDPN,FGF18,NDN,NEURL1,PCDHA10,BEX1
heart development	148	4	2.26	0.012	0.031	Process	4	GJA1,MTERF4,CXADR,PKP2
insulin receptor signaling pathway	151	4	2.21	0.013	0.031	Process	9	STRADB,FGF18,CAV2,PRKAA2
single organismal cell-cell adhesion	96	3	2.25	0.012	0.031	Process	5	PDPN,NRCAM,PKP2
positive regulation of apoptotic process	277	6	2.17	0.015	0.031	Process	8	DNM2,ANKRD1,ALDH1A2,IL6,HOXA5,NEURL1
positive regulation of I-kappaB kinase/NF-kappaB signaling	155	4	2.15	0.015	0.031	Process	9	CTH,TERF2IP,GJA1,BIRC3
positive regulation of sequence-specific DNA binding transcription factor activity	100	3	2.17	0.014	0.031	Process	5	SMARCA4,IL6,BEX1
antigen processing and presentation of peptide antigen via MHC class I	105	3	2.07	0.017	0.033	Process	5	B2M,HLA-A,HLA-C
membrane organization	159	4	2.1	0.016	0.033	Process	4	DNM2,GJA1,PRKAA2,DNAJC6
negative regulation of gene expression	107	3	2.03	0.018	0.035	Process	7	ID2,GJA1,UPK3B
brain development	172	4	1.92	0.022	0.042	Process	4	RELN,AK7,MACROD2,CTTNBP2
cell migration	172	4	1.92	0.022	0.042	Process	6	FER,STRADB,HOXA5,SORBS2
sensory perception of sound	129	3	1.66	0.032	0.059	Process	8	COL11A1,TIMM8B,HOXA1
positive regulation of ERK1 and ERK2 cascade	129	3	1.66	0.032	0.059	Process	12	FGF18,IL6,GCNT2
positive regulation of gene expression	194	4	1.65	0.035	0.063	Process	7	CDK6,ID2,ALDH1A2,GJA1
endocytosis	135	3	1.57	0.037	0.065	Process	6	DNM2,SNX2,AMPH
cytokine-mediated signaling pathway	264	5	1.65	0.037	0.065	Process	7	FER,B2M,HLA-A,HLA-C,IL6
cell adhesion	427	7	1.55	0.046	0.078	Process	3	FER,DSC3,RELN,SORBS2,COL7A1,FLRT3,PCDHA10
cellular lipid metabolic process	145	3	1.44	0.046	0.078	Process	4	ANKRD1,GPD2,PRKAA2
positive regulation of cell migration	146	3	1.42	0.047	0.079	Process	8	FER,PDPN,GCNT2
angiogenesis	213	4	1.45	0.049	0.08	Process	4	HOXA3,CXCL8,NRCAM,FGF18
in utero embryonic development	215	4	1.43	0.05	0.081	Process	8	GJA1,DSC3,LIG4,PEG3
regulation of transcription from RNA polymerase II promoter	360	6	1.48	0.051	0.081	Process	11	SMARCA4,MYCN,PEG3,ANXA4,TFCP2,FOXQ1
receptor-mediated endocytosis	151	3	1.36	0.052	0.082	Process	7	DNM2,PRSS12,M6PR
negative regulation of canonical Wnt signaling pathway	152	3	1.35	0.053	0.082	Process	9	SOX2,DKK2,BICC1
Wnt signaling pathway	157	3	1.29	0.059	0.089	Process	7	PRKAA2,DKK2,TMEM88
inflammatory response	334	5	1.09	0.091	0.14	Process	5	LIPA,PDPN,CXCL8,IL6,NLRP2
cellular nitrogen compound metabolic process	187	3	0.968	0.097	0.14	Process	4	CTH,GLS,OGDH
positive regulation of transcription, DNA-templated	499	7	1.12	0.094	0.14	Process	8	TP53INP2,DNM2,ID2,SMARCA4,SOX2,IL6,MYRF
positive regulation of cell proliferation	437	6	0.981	0.11	0.16	Process	6	FER,HOXA3,FGF18,ALDH1A2,IL6,GCNT2
signal transduction	986	12	0.974	0.13	0.18	Process	4	DNM2,PDPN,CXCL8,FGF18,GJA1,PTPRM,GNG11,PRKAA2,ANXA4,M6PR,GPR143,GPRC5A
cell differentiation	450	6	0.907	0.13	0.18	Process	5	FER,TLL1,ZIC5,FOXQ1,BEX1,EID2
intracellular signal transduction	365	5	0.888	0.12	0.18	Process	6	FER,CXCL8,PRKAA2,FLRT3,RGS7
axon guidance	379	5	0.802	0.14	0.19	Process	14	NRCAM,RELN,FLRT3,GFRA1,SHTN1
response to drug	299	4	0.744	0.15	0.2	Process	4	LOX,B2M,PTPRM,IL6
negative regulation of transcription, DNA-templated	472	6	0.787	0.15	0.2	Process	8	ID2,SMARCA4,RUNX1T1,FOXN3,EID2,ZNF382
transport	306	4	0.696	0.16	0.21	Process	4	SLC25A4,GJA1,SLC7A7,SLC12A3
post-translational protein modification	311	4	0.663	0.16	0.21	Process	8	DPM1,ST6GAL2,ADAMTS5,MUC15
cell division	318	4	0.617	0.17	0.22	Process	4	CDK6,LIG4,ANAPC13,MPLKIP
transcription initiation from RNA polymerase II promoter	240	3	0.522	0.18	0.23	Process	12	GLS,PRKAA2,TAF6
intracellular protein transport	239	3	0.53	0.18	0.23	Process	6	SNX2,RAB17,SYTL5
proteolysis	433	5	0.496	0.22	0.27	Process	6	TLL1,RELN,ADAMTS5,MYRF,MST1
cell proliferation	355	4	0.393	0.23	0.29	Process	3	FER,LIPA,PDPN,LIG4
transmembrane transport	641	7	0.439	0.25	0.3	Process	4	SLC25A4,SLC7A7,SLC12A3,SLC1A1,TRDN,SLCO1A2,SLC2A12
viral process	555	6	0.38	0.26	0.31	Process	4	SLC25A4,LIG4,B2M,HLA-A,HLA-C,TAF6
protein phosphorylation	472	5	0.3	0.28	0.32	Process	7	CDK6,FER,STRADB,PRKAA2,STK31
blood coagulation	487	5	0.228	0.3	0.35	Process	5	SLC7A7,C4BPB,HPS5,CXADR,TFPI2
positive regulation of transcription from RNA polymerase II promoter	886	9	0.277	0.31	0.36	Process	12	SMARCA4,SOX2,ANKRD1,MYCN,IL6,HOXA5,HOXA1,BEX1,NCOA7
immune response	338	3	-0.0804	0.38	0.43	Process	3	CXCL8,HLA-A,HLA-C
cellular protein metabolic process	637	6	0.0345	0.38	0.43	Process	6	CXCL8,DPM1,ST6GAL2,ADAMTS5,MUC15,TIMM8B
negative regulation of transcription from RNA polymerase II promoter	669	6	-0.0888	0.43	0.47	Process	12	ID2,SMARCA4,SOX2,SOX3,ANKRD1,BEND6
spermatogenesis	356	3	-0.172	0.42	0.47	Process	7	BIRC3,AK7,CLDN11
innate immune response	770	7	-0.0593	0.42	0.47	Process	4	FER,FGF18,B2M,BIRC3,HLA-C,NLRP2,C4BPB
negative regulation of apoptotic process	477	4	-0.209	0.46	0.49	Process	8	BIRC3,IL6,PRKAA2,ANXA4
oxidation-reduction process	578	5	-0.163	0.45	0.49	Process	4	LOX,ALDH1A2,GPD2,SC5D,STEAP1B
synaptic transmission	414	3	-0.439	0.54	0.57	Process	6	GLS,SLC1A1,AMPH
positive regulation of GTPase activity	436	3	-0.532	0.58	0.61	Process	8	CAV2,RGS7,DENND2C
transcription from RNA polymerase II promoter	516	3	-0.837	0.71	0.74	Process	11	SOX2,HOXA5,TAF6
apoptotic process	607	3	-1.14	0.82	0.84	Process	6	GJA1,PEG3,DRAM1
G-protein coupled receptor signaling pathway	863	5	-1.1	0.82	0.84	Process	7	CXCL8,GNG11,GPR143,GPRC5A,RGS7
biological_process	650	3	-1.27	0.86	0.87	Process	1	MST1,SORBS2,FLRT3
gene expression	843	4	-1.41	0.9	0.9	Process	5	GLS,PRKAA2,TAF6,IGF2BP1

## Sheet: siggenes_AttenReplicStress_0620
gene.names	direction Level A vs Level B
ADGRF1	up
IFT27	up
CTNND2	up
METRN	up
CAMK2N1	up
MT1E	up
FAM43A	up
KLHL42	up
VAV3	up
MDFIC	up
LIX1	up
SYT13	up
MAL	up
FAT1	up
KCNMA1	up
CLSTN2	up
MGAT4A	up
MVP	up
EFEMP2	up
ZBTB20	up
KIFC2	up
ADGRE5	up
HSPB1	up
RXRA	up
SCD5	up
GOLM1	up
TNNT1	up
NES	up
PAK1	up
FZD8	up
ACKR3	up
S100A6	up
LGALS1	up
NR2F2	up
BIN1	up
NINJ1	up
ST3GAL1	up
RNF212	up
TENT5B	up
GALNT17	up
MIPEP	up
NECTIN1	up
PCOLCE	up
SORCS2	up
FAM20C	up
SLC22A17	up
GAMT	up
ACCS	up
NSD1	up
SERPINE2	up
UBASH3B	up
PTPRD	up
C8orf82	up
IFITM2	up
FGFR1OP2	up
CYC1	up
MT1X	up
KALRN	up
SIX1	up
HUNK	up
FBLN1	up
ZNF704	up
RHPN1	up
FAM222A	up
SERPING1	up
C8orf76	up
RNF139	up
MED30	up
TBC1D31	up
IGFBP2	up
SLC9A1	up
EMC2	up
GUCY1B1	up
PHF20L1	up
S100A4	up
ADGRB2	up
DERL1	up
NRBP2	up
EFR3A	up
PSPC1	up
ZMYM2	up
RAD21	up
SULT1A1	up
NYNRIN	up
MTDH	up
PPFIBP1	up
HAPLN3	up
ATAD2	up
MPHOSPH8	up
SELENBP1	up
AFF3	up
PSMC3	up
SMARCA1	up
LRP12	up
MDK	up
SOX11	up
AMOTL1	up
SPARC	up
FJX1	up
NDRG1	up
ENDOD1	up
TIMP1	up
EPHB2	up
TP53I11	up
FXYD5	up
FKBP10	up
RECQL4	up
KRT8	up
ASS1	up
CRABP2	up
NFIA	up
INTS8	up
SPON1	up
SELENOP	up
BST2	up
HOXD8	up
AC080038.1	up
LINGO1	up
CACNB3	up
EPHB3	up
CASC1	up
FOXG1	up
ROBO1	up
FXYD6	up
SH3PXD2A	up
ABCA4	up
CMTM3	up
SLC26A7	up
CACNA2D1	up
EGFL7	up
FAM92A	up
FABP3	up
TMEM107	up
SESN3	up
TMEM65	up
PPP1R16A	up
ZHX1	up
DLG4	up
KHDRBS3	up
RBP1	up
SVIL	up
TCF4	up
ENY2	up
RASSF8	up
LHX2	up
SEMA6C	up
TM7SF3	up
ITGB5	up
SELENOM	up
ABAT	up
NDUFB9	up
ZMYM5	up
CX3CL1	up
CEP112	up
TMEM246	up
WNK2	up
EMP2	up
DENND1B	up
SLCO3A1	up
TUSC3	up
EPB41L1	up
RUNX1	up
SH3BP2	up
CHRDL1	up
NRG1	up
BACE2	up
ARL4C	up
GRIN2A	up
PLXDC2	up
S1PR3	up
SERINC2	up
TNS1	up
DTX4	up
PALMD	up
TDRD9	up
SESTD1	up
TSPAN5	up
SMARCD3	up
GEMIN8	up
IGFBP5	up
CDKN1A	up
TGM2	up
PTPN3	up
SPATA20	up
NFIC	up
PLEKHG4	up
MFSD2A	up
ARHGEF10L	up
KLHL29	up
PAQR6	up
CDC42EP4	up
AUTS2	up
STAT6	up
FBXO32	up
GSN	up
CD24	up
FAT2	up
FHL2	up
TNS2	up
APOBEC3C	up
KCNH2	up
DGKA	up
CD82	up
FAM107A	up
CNFN	up
TMEM100	up
PLEKHH2	down
SMIM10	down
ANKRD1	down
PTPRM	down
ADAMTS5	down
GLS	down
SOX3	down
FGF18	down
GNG11	down
ZNF677	down
FOXN3	down
LIPA	down
BEX1	down
HOXA4	down
TMEM151A	down
ZNF578	down
AMPH	down
SULF2	down
GAGE10	down
NDN	down
ARMCX1	down
RPRM	down
CLDN11	down
NEBL	down
GPRC5A	down
MRAS	down
GFRA1	down
TTC39C	down
BICC1	down
GABARAPL1	down
NLRP2	down
ZNF599	down
MST1	down
SNX2	down
TRIM36	down
HOXA1	down
MTERF4	down
NHSL1	down
SMARCA4	down
C2orf88	down
FRY	down
FER	down
STK31	down
PCLO	down
CCDC85C	down
GNS	down
ANAPC13	down
TFPI2	down
CDK6	down
NPC2	down
DMD	down
PPP1R11	down
PIEZO1	down
ZNF701	down
ZNF257	down
HOXA3	down
DDX25	down
RGS7	down
LRRC7	down
LOX	down
ZNF382	down
COL7A1	down
PKP2	down
RUNX1T1	down
BIRC3	down
DENND2C	down
HLA-C	down
RAB17	down
FOXQ1	down
TFCP2	down
BEX5	down
SLCO1A2	down
ST6GAL2	down
CAV2	down
PCDHA10	down
KIAA1324L	down
RELN	down
MYCN	down
HOXA5	down
SHTN1	down
CXCL8	down
WDR66	down
GPR143	down
AK5	down
DSC3	down
ANXA4	down
B2M	down
MPLKIP	down
PRSS12	down
STXBP5	down
PRKAA2	down
CLDN15	down
TRNP1	down
GPD2	down
ZFHX4	down
UPK3B	down
SNX24	down
LYRM7	down
CXADR	down
MYRF	down
GJA1	down
PLS3	down
FLRT3	down
HPS5	down
CPEB4	down
LARP1B	down
LIG4	down
ST7	down
CTTNBP2	down
SLC2A12	down
DPM1	down
SC5D	down
STRADB	down
BEND6	down
AC004151.1	down
TAF6	down
SLC25A4	down
TP53INP2	down
SMIM30	down
FITM2	down
NRCAM	down
SLC1A1	down
DRAM1	down
NIPAL1	down
TRDN	down
MUC15	down
ZNF665	down
DNAJC6	down
TIMM8B	down
TLL1	down
IL6	down
TPK1	down
TERF2IP	down
HOXA9	down
PHACTR1	down
CTH	down
POP4	down
GCNT2	down
AK7	down
TMEM88	down
SOX2	down
IGF2BP1	down
ZNF556	down
SHE	down
SYTL5	down
SLC7A7	down
PON3	down
SAXO2	down
COL11A1	down
SLC12A3	down
HLA-A	down
PEG3	down
ZNF804A	down
C4BPB	down
MAB21L3	down
NEURL1	down
TRUB1	down
ID2	down
RIPOR3	down
EID2	down
STEAP1B	down
ALDH1A2	down
MACROD2	down
MAGOHB	down
ARMCX4	down
TMEM230	down
EPSTI1	down
PCDH17	down
ZIC5	down
GLCCI1	down
NCOA7	down
PDPN	down
DNM2	down
GSE1	down
LRCH2	down
SORBS2	down
LPCAT3	down
DKK2	down
OGDH	down
NEB	down
NHLRC1	down
M6PR	down
RNASET2	down

[truncated: 6 more sheets: NuclResp_upGOBP, NuclResp_downGOBP, siggenes_NuclResp_0620, CongrDef.thr2.upGOBP, CongrDef.thr2.downGOBP, siggenes_CongrDef_thr2_0620]
